# Supplementary material for: A bifunctional catalyst for carbon dioxide fixation: cooperative double activation of epoxides for the synthesis of cyclic carbonates
Source: Royal Society of Chemistry journal article supplement (doi:10.1039/c2cc30591g), 2012-01-01

## Supplementary Information

### **Bifunctional catalyst for carbon dioxide fixation: cooperative double activation of epoxides for the synthesis of cyclic carbonates**

Tadashi Ema,\* Yuki Miyazaki, Shohei Koyama, Yuya Yano and Takashi Sakai\*  
*Division of Chemistry and Biochemistry, Graduate School of Natural Science and Technology,  
Okayama University, Tsushima, Okayama 700-8530, Japan*

|                                                            |     |
|------------------------------------------------------------|-----|
| [1] Synthesis of Bifunctional Catalysts <b>1</b> -----     | S2  |
| [2] Coupling Reaction of CO <sub>2</sub> with Epoxide----- | S8  |
| [3] Screening of Two-component Catalytic Systems-----      | S11 |
| [4] Summary of Reported Porphyrin Catalysts-----           | S12 |
| [5] <sup>1</sup> H and <sup>13</sup> C NMR Spectra-----    | S13 |

## [1] Synthesis of Bifunctional Catalysts 1.

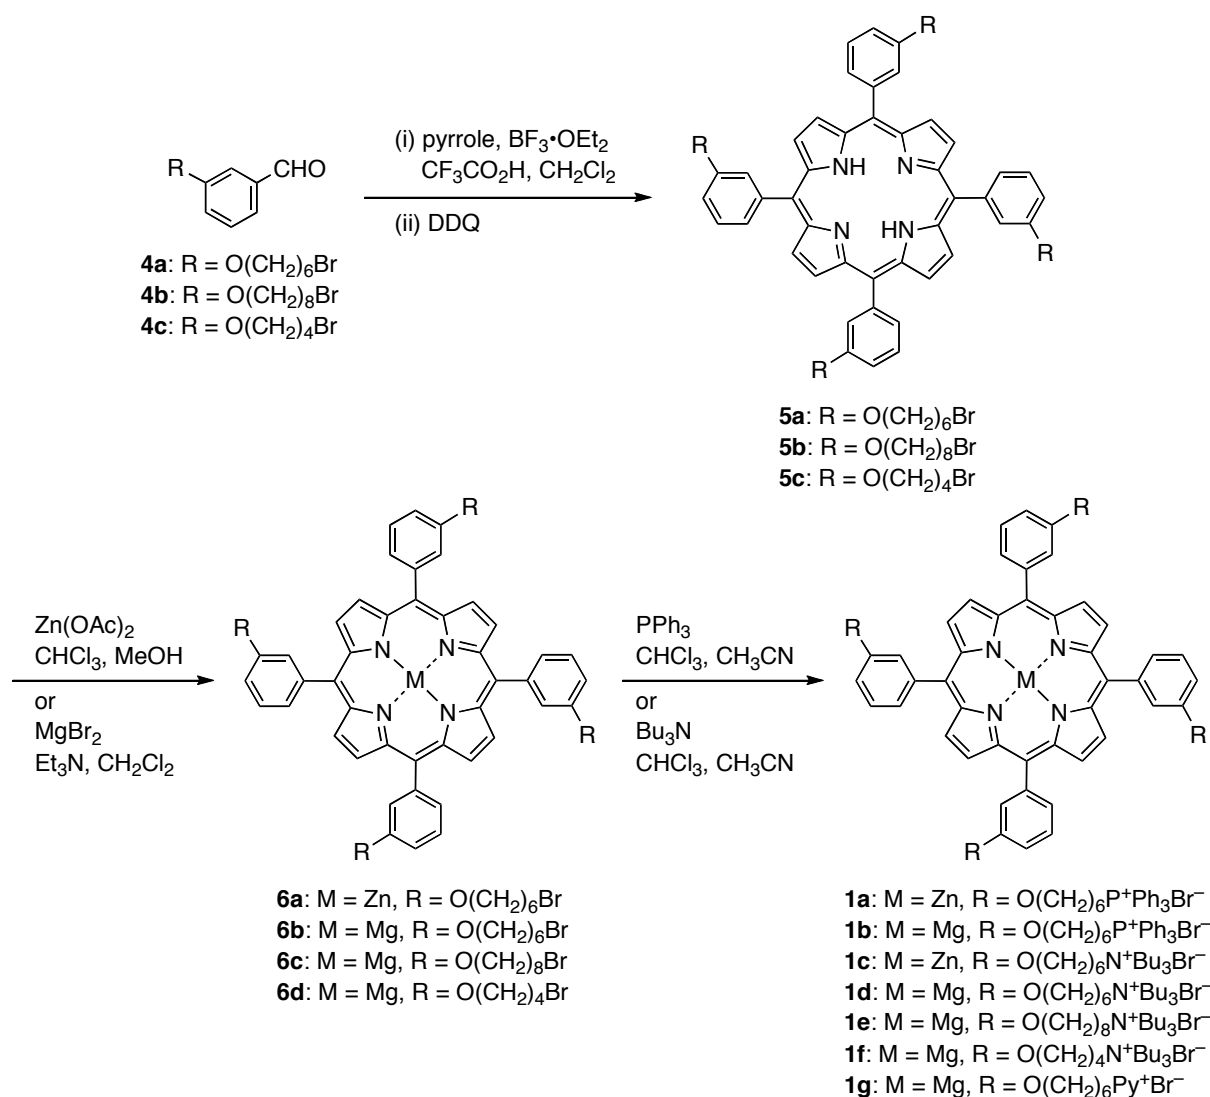

### 5,10,15,20-Tetrakis[3-(6-bromohexyloxy)phenyl]porphyrin (5a).

A solution of pyrrole (695  $\mu$ L, 10.0 mmol) and 3-(6-bromohexyloxy)benzaldehyde (**4a**)<sup>1,2</sup> (2.86 g, 10.0 mmol) in dry CH<sub>2</sub>Cl<sub>2</sub> (1.0 L) was bubbled with Ar, and then BF<sub>3</sub>·OEt<sub>2</sub> (12  $\mu$ L, 0.097 mmol) and CF<sub>3</sub>CO<sub>2</sub>H (670  $\mu$ L, 9.02 mmol) were added. The mixture was stirred at room temperature for 4 h in the dark. 2,3-Dichloro-5,6-dicyano-1,4-benzoquinone (DDQ, 2.27 g, 10.0 mmol) was added, and the mixture was stirred at room temperature for 9 h. Et<sub>3</sub>N (1.0 mL, 7.2 mmol) was added, and the mixture was concentrated. Purification by silica gel column chromatography (CHCl<sub>3</sub>/hexane (2:1)) gave **5a** as a purple solid (1.73 g, 52%): <sup>1</sup>H NMR (CDCl<sub>3</sub>, 600 MHz)  $\delta$  -2.80 (s, 2H), 1.55 (br s, 16H), 1.89–1.92 (m, 16H), 3.41 (t, *J* = 6.8 Hz, 8H), 4.15 (t, *J* = 6.4 Hz, 8H), 7.32 (dd, *J* = 2.3, 8.5 Hz, 4H), 7.63 (t, *J* = 7.9 Hz, 4H), 7.77 (s, 4H), 7.81 (d, *J* = 7.1 Hz, 4H), 8.90 (s, 8H); <sup>13</sup>C NMR (CDCl<sub>3</sub>, 150 MHz, 50 °C)  $\delta$  25.4, 28.0, 29.2, 32.7, 33.5, 68.2, 114.3, 120.0, 121.4, 127.5, 127.6, 131.1, 143.6, 146.7, 157.6; IR (KBr) 3317, 3063, 2932, 2862, 1589, 1466, 1435, 1342, 1281, 1173, 1042, 972, 926, 795, 733, 648 cm<sup>-1</sup>; Anal. Calcd for C<sub>68</sub>H<sub>74</sub>Br<sub>4</sub>N<sub>4</sub>O<sub>4</sub>: C, 61.36; H, 5.60; N, 4.21. Found: C,

60.99; H, 5.76; N, 4.11; MS (FAB) calcd for  $C_{68}H_{75}^{79}Br_2^{81}Br_2N_4O_4$  1331.2, found 1331.3 ( $[M + H]^+$ ) (cluster peaks based on isotope abundance).

#### **5,10,15,20-Tetrakis[3-(8-bromooctyloxy)phenyl]porphyrin (5b).**

A solution of pyrrole (0.81 mL, 12 mmol) and 3-(8-bromooctyloxy)benzaldehyde (**4b**)<sup>1,2</sup> (3.66 g, 11.7 mmol) in dry  $CH_2Cl_2$  (1.2 L) was bubbled with Ar, and then  $BF_3 \cdot OEt_2$  (15  $\mu$ L, 0.12 mmol) and  $CF_3CO_2H$  (0.78 mL, 11 mmol) were added. The mixture was stirred at room temperature for 4 h in the dark. DDQ (2.66 g, 11.7 mmol) was added, and the mixture was stirred at room temperature for 13 h.  $Et_3N$  (1.2 mL, 8.6 mmol) was added, and the mixture was concentrated. Purification by silica gel column chromatography ( $CHCl_3$ /hexane (4:3)) gave **5b** as a purple highly viscous solid (2.24 g, 53%):  $^1H$  NMR ( $CDCl_3$ , 600 MHz)  $\delta$  -2.79 (s, 2H), 1.35–1.46 (m, 24H), 1.50–1.54 (m, 8H), 1.82–1.90 (m, 16H), 3.38 (t,  $J$  = 6.8 Hz, 8H), 4.15 (t,  $J$  = 6.5 Hz, 8H), 7.33 (dd,  $J$  = 2.0, 8.4 Hz, 4H), 7.64 (t,  $J$  = 7.9 Hz, 4H), 7.78 (s, 4H), 7.81 (d,  $J$  = 7.3 Hz, 4H), 8.91 (s, 8H);  $^{13}C$  NMR ( $CDCl_3$ , 150 MHz, 50  $^\circ C$ )  $\delta$  26.0, 28.1, 28.6, 29.2, 29.4, 32.8, 33.6, 68.3, 114.3, 120.0, 121.4, 127.4, 127.6, 131.1, 143.5, 146.8, 157.6; IR ( $CH_2Cl_2$ ) 3317, 3031, 2932, 2862, 1597, 1466, 1435, 1396, 1350, 1281, 1180, 1042, 995, 980, 918, 872, 802, 748, 702, 640  $cm^{-1}$ ; Anal. Calcd for  $C_{76}H_{90}Br_4N_4O_4$ : C, 63.25; H, 6.29; N, 3.88. Found: C, 63.64; H, 6.38; N, 3.49; MS (FAB) calcd for  $C_{76}H_{91}^{79}Br_2^{81}Br_2N_4O_4$  1443.4, found 1443.4 ( $[M + H]^+$ ) (cluster peaks based on isotope abundance).

#### **5,10,15,20-Tetrakis[3-(4-bromobutoxy)phenyl]porphyrin (5c).**

A solution of pyrrole (140  $\mu$ L, 2.02 mmol) and 3-(4-bromobutoxy)benzaldehyde (**4c**)<sup>1,2</sup> (521 mg, 2.03 mmol) in dry  $CH_2Cl_2$  (200 mL) was bubbled with Ar, and then  $BF_3 \cdot OEt_2$  (3  $\mu$ L, 20  $\mu$ mol) and  $CF_3CO_2H$  (135  $\mu$ L, 1.82 mmol) were added. The mixture was stirred at room temperature for 4 h in the dark. DDQ (455 mg, 2.00 mmol) was added, and the mixture was stirred at room temperature for 12 h.  $Et_3N$  (0.28 mL, 2.0 mmol) was added, and the mixture was concentrated. Purification by silica gel column chromatography ( $CHCl_3$ /hexane (2:1)) gave **5c** as a purple solid (349 mg, 57%):  $^1H$  NMR ( $CDCl_3$ , 600 MHz)  $\delta$  -2.82 (s, 2H), 2.04 (quint,  $J$  = 6.6 Hz, 8H), 2.14 (quint,  $J$  = 6.6 Hz, 8H), 3.52 (t,  $J$  = 6.6 Hz, 8H), 4.19 (t,  $J$  = 6.0 Hz, 8H), 7.32 (dd,  $J$  = 2.5, 8.5 Hz, 4H), 7.64 (t,  $J$  = 7.9 Hz, 4H), 7.76 (s, 4H), 7.81 (d,  $J$  = 7.3 Hz, 4H), 8.88 (s, 8H);  $^{13}C$  NMR ( $CDCl_3$ , 150 MHz, 50  $^\circ C$ )  $\delta$  28.1, 29.6, 33.2, 67.3, 114.3, 119.9, 121.3, 127.5, 127.8, 131.1, 143.6, 157.4; IR (KBr) 3314, 3063, 2936, 2870, 1597, 1574, 1470, 1431, 1396, 1346, 1285, 1261, 1165, 1045, 976, 949, 918, 880, 802, 775, 733, 698, 660  $cm^{-1}$ ; HRMS (FAB) calcd for  $C_{60}H_{59}^{79}Br_2^{81}Br_2N_4O_4$  1219.1229, found 1219.1172 ( $[M + H]^+$ ) (cluster peaks based on isotope abundance).

#### **5,10,15,20-Tetrakis[3-(6-bromohexyloxy)phenyl]porphyrin zinc(II) (6a).**

A solution of porphyrin **5a** (266 mg, 0.200 mmol) in dry  $CHCl_3$  (28 mL) under  $N_2$  was heated at 70  $^\circ C$  for 45 min. A solution of  $Zn(OAc)_2 \cdot 2H_2O$  (439 mg, 2.00 mmol) in dry MeOH (4 mL) was added, and the mixture was heated at 70  $^\circ C$  for 4 h. The mixture was cooled to room

temperature, concentrated, and washed with water. The mixture was dried over Na<sub>2</sub>SO<sub>4</sub>, and concentrated. Purification by silica gel column chromatography (CH<sub>2</sub>Cl<sub>2</sub>/hexane (2:1)) gave **6a** as a reddish purple solid (272 mg, 98%): <sup>1</sup>H NMR (CDCl<sub>3</sub>, 600 MHz) δ 1.53–1.55 (m, 16H), 1.88–1.90 (m, 16H), 3.40 (t, *J* = 6.8 Hz, 8H), 4.11–4.15 (m, 8H), 7.30–7.32 (m, 4H), 7.63 (t, *J* = 7.9 Hz, 4H), 7.76–7.77 (m, 4H), 7.81 (d, *J* = 7.3 Hz, 4H), 9.00 (s, 8H); <sup>13</sup>C NMR (CDCl<sub>3</sub>, 150 MHz) δ 25.3, 27.9, 29.1, 32.6, 33.7, 67.9, 114.0, 120.9, 121.0, 127.3, 127.5, 132.0, 144.0, 150.1, 157.1; IR (KBr) 3062, 2936, 2858, 1597, 1578, 1477, 1435, 1339, 1285, 1258, 1184, 1049, 999, 937, 799, 721, 702, 648 cm<sup>-1</sup>; Anal. Calcd for C<sub>68</sub>H<sub>72</sub>Br<sub>4</sub>N<sub>4</sub>O<sub>4</sub>Zn: C, 58.57; H, 5.20; N, 4.02. Found: C, 58.65; H, 5.25; N, 3.70; MS (FAB) calcd for C<sub>68</sub>H<sub>73</sub><sup>79</sup>Br<sub>2</sub><sup>81</sup>Br<sub>2</sub>N<sub>4</sub>O<sub>4</sub><sup>64</sup>Zn 1393.2, found 1393.2 ([M + H]<sup>+</sup>) (cluster peaks based on isotope abundance).

#### **5,10,15,20-Tetrakis[3-(6-bromohexyloxy)phenyl]porphyrin magnesium(II) (6b).**

A mixture of porphyrin **5a** (266 mg, 0.200 mmol) and MgBr<sub>2</sub> (368 mg, 2.00 mmol) in dry CH<sub>2</sub>Cl<sub>2</sub> (17 mL) under N<sub>2</sub> was stirred at room temperature for 5 min, and Et<sub>3</sub>N (1.7 mL, 12 mmol) was added. The mixture was stirred at room temperature for 30 min. The mixture was washed with 0.5% HCl and then water. The mixture was dried over Na<sub>2</sub>SO<sub>4</sub>, and concentrated. Recrystallization from CH<sub>2</sub>Cl<sub>2</sub>/hexane gave **6b** as a purple solid (261 mg, 96%): <sup>1</sup>H NMR (CDCl<sub>3</sub>, 600 MHz) δ 1.53–1.54 (m, 16H), 1.86–1.91 (m, 16H), 3.40 (t, *J* = 6.8 Hz, 8H), 4.14 (t, *J* = 6.4 Hz, 8H), 7.29 (dd, *J* = 2.0, 8.4 Hz, 4H), 7.60 (t, *J* = 7.9 Hz, 4H), 7.78 (br s, 4H), 7.81 (d, *J* = 7.6 Hz, 4H), 8.91 (s, 8H); <sup>13</sup>C NMR (CDCl<sub>3</sub>, 150 MHz, 50 °C) δ 25.3, 27.9, 29.1, 32.7, 33.5, 68.3, 113.9, 121.3, 121.7, 126.9, 128.0, 131.8, 145.1, 149.9, 156.9; IR (KBr) 3055, 2932, 2862, 1666, 1597, 1474, 1427, 1389, 1335, 1281, 1180, 1049, 995, 941, 880, 795, 725, 640 cm<sup>-1</sup>; Anal. Calcd for C<sub>68</sub>H<sub>72</sub>Br<sub>4</sub>MgN<sub>4</sub>O<sub>4</sub>: C, 60.35; H, 5.36; N, 4.14. Found: C, 60.12; H, 5.48; N, 3.76; MS (FAB) calcd for C<sub>68</sub>H<sub>73</sub><sup>79</sup>Br<sub>2</sub><sup>81</sup>Br<sub>2</sub>MgN<sub>4</sub>O<sub>4</sub> 1353.2, found 1353.2 ([M + H]<sup>+</sup>) (cluster peaks based on isotope abundance).

#### **5,10,15,20-Tetrakis[3-(8-bromooctyloxy)phenyl]porphyrin magnesium (6c).**

A mixture of porphyrin **5b** (588 mg, 0.407 mmol) and MgBr<sub>2</sub> (752 mg, 4.09 mmol) in dry CH<sub>2</sub>Cl<sub>2</sub> (34 mL) under N<sub>2</sub> was stirred at room temperature for 5 min, and Et<sub>3</sub>N (3.4 mL, 24 mmol) was added. The mixture was stirred at room temperature for 30 min. The mixture was washed with 0.5% HCl and then water. The mixture was dried over Na<sub>2</sub>SO<sub>4</sub>, and concentrated. Recrystallization from CH<sub>2</sub>Cl<sub>2</sub>/hexane gave **6c** as a purple highly viscous solid (547 mg, 92%): <sup>1</sup>H NMR (CDCl<sub>3</sub>, 600 MHz) δ 1.33–1.52 (m, 32H), 1.80–1.85 (m, 16H), 3.36 (t, *J* = 6.8 Hz, 8H), 4.03–4.09 (m, 8H), 7.24–7.25 (m, 4H), 7.59 (t, *J* = 7.9 Hz, 4H), 7.73 (br s, 4H), 7.80 (d, *J* = 7.2 Hz, 4H), 8.91 (s, 8H); <sup>13</sup>C NMR (CDCl<sub>3</sub>, 150 MHz) δ 25.7, 25.76, 25.80, 25.83, 28.0, 28.59, 28.60, 28.9, 28.96, 29.04, 29.07, 29.10, 32.7, 33.9, 68.3, 113.76, 113.84, 121.3, 121.4, 126.9, 127.8, 131.9, 144.8, 149.7, 156.5, 156.6 (signals for the atropisomers were observed); IR (CH<sub>2</sub>Cl<sub>2</sub>) 3047, 2936, 2858, 1597, 1576, 1518, 1472, 1431, 1391, 1333, 1285, 1265, 1207, 1184, 1165, 1067, 999, 937, 870, 800, 785, 756, 708, 644 cm<sup>-1</sup>; Anal. Calcd for

$C_{76}H_{88}Br_4MgN_4O_4$ : C, 62.29; H, 6.05; N, 3.82. Found: C, 62.24; H, 5.97; N, 3.57; MS (FAB) calcd for  $C_{76}H_{89}^{79}Br_2^{81}BrMgN_4O_4$  1465.3, found 1465.4 ( $[M + H]^+$ ) (cluster peaks based on isotope abundance).

**5,10,15,20-Tetrakis[3-(4-bromobutoxy)phenyl]porphyrin magnesium(II) (6d).**

A mixture of porphyrin **5c** (515 mg, 0.423 mmol) and  $MgBr_2$  (779 mg, 4.23 mmol) in dry  $CH_2Cl_2$  (35 mL) under  $N_2$  was stirred at room temperature for 5 min, and  $Et_3N$  (3.5 mL, 25 mmol) was added. The mixture was stirred at room temperature for 30 min. The mixture was washed with 0.5% HCl and then water. The mixture was dried over  $Na_2SO_4$ , and concentrated. Recrystallization from  $CH_2Cl_2$ /hexane gave **6d** as a purple solid (474 mg, 90%):  $^1H$  NMR ( $CDCl_3$ , 600 MHz)  $\delta$  1.97–2.00 (m, 8H), 2.08–2.12 (m, 8H), 3.50 (t,  $J = 6.6$  Hz, 8H), 4.13 (t,  $J = 4.7$  Hz, 8H), 7.26 (d,  $J = 7.9$  Hz, 4H), 7.60 (t,  $J = 7.9$  Hz, 4H), 7.74 (s, 4H), 7.82 (d,  $J = 7.0$  Hz, 4H), 8.91 (s, 8H);  $^{13}C$  NMR ( $CDCl_3$ , 150 MHz)  $\delta$  27.7, 29.3, 33.5, 67.1, 113.7, 121.3, 127.0, 127.9, 131.9, 144.9, 149.7, 156.5; IR (KBr) 3063, 2943, 2870, 1597, 1574, 1474, 1431, 1389, 1330, 1285, 1254, 1184, 1065, 1045, 1022, 999, 961, 883, 799, 725, 698  $cm^{-1}$ ; Anal. Calcd for  $C_{60}H_{56}Br_4MgN_4O_4$ : C, 58.07; H, 4.55; N, 4.51. Found: C, 57.86; H, 4.81; N, 4.12; HRMS (FAB) calcd for  $C_{60}H_{57}^{79}Br_3^{81}BrMgN_4O_4$  1239.0943, found 1239.0964 ( $[M + H]^+$ ) (cluster peaks based on isotope abundance).

**5,10,15,20-Tetrakis[3-(6-triphenylphosphoniohexyloxy)phenyl]porphyrin zinc(II) tetrabromide (1a).**

A solution of  $Zn^{II}$  porphyrin **6a** (139 mg, 0.100 mmol) and  $PPh_3$  (315 mg, 1.20 mmol) in dry  $CHCl_3$  (1 mL) and dry  $CH_3CN$  (1 mL) under Ar was heated at 70 °C for 48 h in the dark. The mixture was cooled to room temperature, and concentrated. The crude product was washed with  $Et_2O$ , and filtered. Recrystallization from  $CH_2Cl_2/Et_2O$  gave **1a** as a purple solid (207 mg, 85%):  $^1H$  NMR ( $d_6$ -DMSO, 600 MHz)  $\delta$  1.50–1.55 (m, 24H), 1.74–1.81 (m, 8H), 3.59 (br s, 8H), 4.13 (br s, 8H), 7.35–7.36 (m, 4H), 7.66–7.83 (m, 72H), 8.78 (s, 8H);  $^{13}C$  NMR ( $CD_3OD$ , 150 MHz)  $\delta$  22.4 (d,  $J_{CP} = 51.6$  Hz), 23.3, 26.3, 29.8, 30.9 (d,  $J_{CP} = 15.6$  Hz), 68.8, 114.2, 119.7 (d,  $J_{CP} = 85.7$  Hz), 121.6, 122.8, 128.4, 128.6, 131.4 (d,  $J_{CP} = 12.6$  Hz), 132.6, 134.6 (d,  $J_{CP} = 9.7$  Hz), 136.0, 145.8, 151.2, 158.5;  $^{31}P$  NMR ( $CD_3OD$ , 243 MHz)  $\delta$  24.2; IR (KBr) 3055, 2932, 2862, 1582, 1474, 1435, 1327, 1281, 1173, 1111, 1057, 995, 934, 787, 725, 687  $cm^{-1}$ ; HRMS (ESI) calcd for  $C_{140}H_{132}^{81}Br_3N_4O_4P_4^{64}Zn$  2363.5979, found 2363.5986 ( $[M - Br]^+$ ) (cluster peaks based on isotope abundance).

**5,10,15,20-Tetrakis[3-(6-triphenylphosphoniohexyloxy)phenyl]porphyrin magnesium(II) tetrabromide (1b).**

A solution of  $Mg^{II}$  porphyrin **6b** (271 mg, 0.200 mmol) and  $PPh_3$  (630 mg, 2.40 mmol) in dry  $CHCl_3$  (2 mL) and dry  $CH_3CN$  (2 mL) under Ar was heated at 70 °C for 48 h in the dark. The mixture was cooled to room temperature, and concentrated. The crude product was washed with  $Et_2O$ , and filtered. Recrystallization from  $CH_2Cl_2/Et_2O$  gave **1b** as a purple solid (337 mg,

70%):  $^1\text{H}$  NMR ( $\text{CD}_3\text{OD}$ , 600 MHz)  $\delta$  1.58–1.69 (m, 24H), 1.82 (br s, 8H), 3.35–3.38 (m, 8H), 4.15 (br s, 8H), 7.31 (d,  $J = 8.4$  Hz, 4H), 7.62–7.74 (m, 72H), 8.77–8.78 (m, 8H);  $^{13}\text{C}$  NMR ( $\text{CD}_3\text{OD}$ , 150 MHz)  $\delta$  22.4 (d,  $J_{\text{CP}} = 49.9$  Hz), 23.3, 26.3, 29.8, 31.0 (d,  $J_{\text{CP}} = 15.9$  Hz), 68.8, 114.0, 119.7 (d,  $J_{\text{CP}} = 85.1$  Hz), 122.6, 122.9, 128.3, 128.8, 131.4 (d,  $J_{\text{CP}} = 12.3$  Hz), 132.7, 134.6 (d,  $J_{\text{CP}} = 9.2$  Hz), 136.1, 146.3, 151.1, 158.5;  $^{31}\text{P}$  NMR ( $\text{CD}_3\text{OD}$ , 243 MHz)  $\delta$  28.2; IR (KBr) 3055, 2939, 2862, 1593, 1516, 1477, 1435, 1331, 1285, 1254, 1180, 1111, 1061, 995, 934, 883, 795, 721, 691  $\text{cm}^{-1}$ ; HRMS (ESI) calcd for  $\text{C}_{140}\text{H}_{132}^{81}\text{BrMgN}_4\text{O}_4\text{P}_4$  720.6071, found 720.5831 ( $[\text{M} - 3\text{Br}]^{3+}$ ) (cluster peaks based on isotope abundance).

**5,10,15,20-Tetrakis[3-(6-tributylammoniohexyloxy)phenyl]porphyrin zinc(II) tetrabromide (1c).**

A solution of  $\text{Zn}^{\text{II}}$  porphyrin **6a** (110 mg, 0.0788 mmol) and  $\text{Bu}_3\text{N}$  (0.45 mL, 1.9 mmol) in dry  $\text{CHCl}_3$  (0.79 mL) and dry  $\text{CH}_3\text{CN}$  (0.79 mL) under  $\text{N}_2$  was heated at 70 °C for 90 h in the dark. The mixture was cooled to room temperature, and concentrated. A layer of  $\text{Bu}_3\text{N}$  was removed with a pipette.  $\text{CH}_2\text{Cl}_2$  was added, and the mixture was washed with 0.5% HBr and then water containing NaBr. The mixture was dried over  $\text{Na}_2\text{SO}_4$ , and concentrated. Recrystallization from  $\text{CH}_2\text{Cl}_2/\text{Et}_2\text{O}$  gave **1c** as a purple solid (123 mg, 73%):  $^1\text{H}$  NMR ( $\text{CD}_3\text{OD}$ , 600 MHz)  $\delta$  0.92–0.97 (m, 36H), 1.31–1.64 (m, 72H), 1.89 (br s, 8H), 3.11–3.20 (m, 32H), 4.19–4.20 (m, 8H), 7.34–7.35 (m, 4H), 7.62–7.65 (m, 4H), 7.73–7.77 (m, 8H), 8.85 (s, 8H);  $^{13}\text{C}$  NMR ( $\text{CD}_3\text{OD}$ , 150 MHz)  $\delta$  14.0, 20.5, 22.58, 22.62, 24.6, 26.6, 26.9, 30.1, 59.3, 68.9, 114.3, 121.6, 122.7, 128.4, 128.6, 132.7, 145.9, 151.3, 158.7; IR (KBr) 3063, 2936, 2870, 1597, 1574, 1474, 1431, 1385, 1335, 1285, 1258, 1180, 1049, 995, 937, 880, 791, 718, 702  $\text{cm}^{-1}$ ; HRMS (ESI) calcd for  $\text{C}_{116}\text{H}_{180}^{81}\text{BrN}_8\text{O}_4^{64}\text{Zn}$  631.4194, found 631.3962 ( $[\text{M} - 3\text{Br}]^{3+}$ ) (cluster peaks based on isotope abundance).

**5,10,15,20-Tetrakis[3-(6-tributylammoniohexyloxy)phenyl]porphyrin magnesium(II) tetrabromide (1d).**

A solution of  $\text{Mg}^{\text{II}}$  porphyrin **6b** (135 mg, 0.100 mmol) and  $\text{Bu}_3\text{N}$  (0.57 mL, 2.4 mmol) in dry  $\text{CHCl}_3$  (1 mL) and dry  $\text{CH}_3\text{CN}$  (1 mL) under Ar was heated at 70 °C for 90 h in the dark. The mixture was cooled to room temperature, and concentrated. A layer of  $\text{Bu}_3\text{N}$  was removed with a pipette.  $\text{CH}_2\text{Cl}_2$  was added, and the mixture was washed with 0.5% HBr and then water containing NaBr. The mixture was dried over  $\text{Na}_2\text{SO}_4$ , and concentrated. Recrystallization from  $\text{CH}_2\text{Cl}_2/\text{Et}_2\text{O}$  gave **1d** as a purple solid (157 mg, 75%):  $^1\text{H}$  NMR ( $\text{CD}_3\text{OD}$ , 600 MHz)  $\delta$  0.93–1.01 (m, 36H), 1.32–1.36 (m, 24H), 1.45–1.50 (m, 8H), 1.57–1.71 (m, 40H), 1.89–1.95 (m, 8H), 3.14–3.24 (m, 32H), 4.21 (br s, 8H), 7.34 (dd,  $J = 1.8, 8.6$  Hz, 4H), 7.63 (t,  $J = 7.9$  Hz, 4H), 7.74–7.75 (m, 4H), 7.78 (d,  $J = 6.5$  Hz, 4H), 8.81–8.82 (m, 8H);  $^{13}\text{C}$  NMR ( $\text{CD}_3\text{OD}$ , 150 MHz)  $\delta$  14.0, 20.6, 22.6, 22.7, 24.7, 26.6, 26.9, 30.1, 59.3, 68.9, 114.2, 122.6, 122.8, 128.3, 128.8, 132.7, 146.4, 151.2, 158.6; IR (KBr) 3038, 2963, 2876, 1597, 1578, 1474, 1431, 1383, 1333, 1279, 1184, 1165, 997, 937, 880, 799, 727, 710, 694  $\text{cm}^{-1}$ ; HRMS (ESI) calcd for  $\text{C}_{116}\text{H}_{180}^{79}\text{Br}^{81}\text{Br}_2\text{MgN}_8\text{O}_4$  2014.1487, found 2014.1243 ( $[\text{M} - \text{Br}]^+$ ) (cluster peaks based on



isotope abundance).

**5,10,15,20-Tetrakis[3-(8-tributylammoniooctyloxy)phenyl]porphyrin magnesium(II) tetrabromide (1e).**

A solution of Mg<sup>II</sup> porphyrin **6c** (147 mg, 0.100 mmol) and Bu<sub>3</sub>N (0.57 mL, 2.4 mmol) in dry CHCl<sub>3</sub> (1 mL) and dry CH<sub>3</sub>CN (1 mL) under Ar was heated at 70 °C for 92 h in the dark. The mixture was cooled to room temperature, and concentrated. A layer of Bu<sub>3</sub>N was removed with a pipette. CH<sub>2</sub>Cl<sub>2</sub> was added, and the mixture was washed with 0.5% HBr and then water containing NaBr. The mixture was dried over Na<sub>2</sub>SO<sub>4</sub>, and concentrated. Recrystallization from CH<sub>2</sub>Cl<sub>2</sub>/Et<sub>2</sub>O gave **1e** as a purple solid (187 mg, 85%): <sup>1</sup>H NMR (CD<sub>3</sub>OD, 600 MHz) δ 0.90–0.99 (m, 36H), 1.21–1.52 (m, 88H), 1.84–1.87 (m, 8H), 2.98–3.00 (m, 32H), 4.16 (br s, 8H), 7.31 (d, *J* = 8.3 Hz, 4H), 7.62 (t, *J* = 7.8 Hz, 4H), 7.73 (br s, 4H), 7.77 (br s, 4H), 8.85 (s, 8H); <sup>13</sup>C NMR (CD<sub>3</sub>OD, 150 MHz) δ 14.0, 20.5, 22.6, 24.6, 27.0, 27.1, 29.9, 30.1, 30.4, 59.2, 59.4, 69.2, 114.2, 122.6, 122.8, 128.3, 128.8, 132.8, 146.4, 151.2, 158.7; IR (KBr) 3038, 2939, 2876, 1597, 1578, 1474, 1433, 1383, 1333, 1281, 1207, 1184, 1165, 997, 937, 880, 799, 712, 696 cm<sup>-1</sup>; HRMS (ESI) calcd for C<sub>124</sub>H<sub>196</sub><sup>79</sup>Br<sup>81</sup>Br<sub>2</sub>MgN<sub>8</sub>O<sub>4</sub> 2126.2739, found 2126.2368 ([M – Br]<sup>+</sup>) (cluster peaks based on isotope abundance).

**5,10,15,20-Tetrakis[3-(4-tributylammoniobutoxy)phenyl]porphyrin magnesium(II) tetrabromide (1f).**

A solution of Mg<sup>II</sup> porphyrin **6d** (124 mg, 0.100 mmol) and Bu<sub>3</sub>N (0.57 mL, 2.4 mmol) in dry CHCl<sub>3</sub> (1 mL) and dry CH<sub>3</sub>CN (1 mL) under Ar was heated at 70 °C for 90 h in the dark. The mixture was cooled to room temperature, and concentrated. A layer of Bu<sub>3</sub>N was removed with a pipette. CH<sub>2</sub>Cl<sub>2</sub> was added, and the mixture was washed with 0.5% HBr and then water containing NaBr. The mixture was dried over Na<sub>2</sub>SO<sub>4</sub>, and concentrated. Recrystallization from CH<sub>2</sub>Cl<sub>2</sub>/Et<sub>2</sub>O gave **1f** as a purple solid (192 mg, 97%): <sup>1</sup>H NMR (CD<sub>3</sub>OD, 600 MHz) δ 0.89–1.00 (m, 36H), 1.32–1.42 (m, 24H), 1.65–1.67 (m, 24H), 1.98 (br s, 16H), 3.23–3.28 (m, 24H), 3.40 (br s, 8H), 4.30 (br s, 8H), 7.38 (d, *J* = 8.2 Hz, 4H), 7.66 (t, *J* = 8.0 Hz, 4H), 7.79–7.81 (m, 8H), 8.79–8.80 (m, 8H); <sup>13</sup>C NMR (CD<sub>3</sub>OD, 150 MHz) δ 14.0, 19.7, 20.6, 24.7, 26.8, 59.0, 59.4, 67.8, 114.1, 122.4, 122.7, 128.3, 129.1, 132.6, 146.7, 151.1, 158.3; IR (KBr) 3063, 2959, 2874, 1597, 1574, 1474, 1435, 1381, 1331, 1285, 1257, 1180, 1065, 995, 934, 880, 799, 721, 702 cm<sup>-1</sup>; HRMS (ESI) calcd for C<sub>108</sub>H<sub>164</sub><sup>81</sup>BrMgN<sub>8</sub>O<sub>4</sub> 580.7296, found 580.7075 ([M – 3Br]<sup>3+</sup>) (cluster peaks based on isotope abundance).

**5,10,15,20-Tetrakis[3-(6-pyridiniohexyloxy)phenyl]porphyrin magnesium(II) tetrabromide (1g).**

A solution of Mg<sup>II</sup> porphyrin **6b** (136 mg, 0.100 mmol) in pyridine (2 mL) was heated under N<sub>2</sub> at 115 °C for 14 h. The mixture was cooled to room temperature, and concentrated. Recrystallization from MeOH/EtOAc gave **1g** as a purple solid (162 mg, 97%): <sup>1</sup>H NMR (CD<sub>3</sub>OD, 600 MHz) δ 1.32–1.38 (m, 8H), 1.52–1.53 (m, 8H), 1.78–1.81 (m, 8H), 1.85–1.93

(m, 8H), 4.10–4.12 (m, 8H), 4.34–4.42 (m, 8H), 7.26 (d,  $J = 7.9$  Hz, 4H), 7.59 (t,  $J = 7.8$  Hz, 4H), 7.70 (s, 4H), 7.76 (d,  $J = 7.8$  Hz, 4H), 7.81–7.87 (m, 8H), 8.27–8.33 (m, 4H), 8.70–8.78 (m, 8H), 8.82 (s, 8H);  $^{13}\text{C}$  NMR ( $\text{CD}_3\text{OD}$ , 150 MHz)  $\delta$  26.5, 26.7, 30.0, 32.1, 62.6, 68.9, 114.2, 122.6, 122.8, 128.3, 128.8, 129.1, 132.8, 145.5, 146.3, 146.5, 151.1, 158.6; IR (KBr) 3051, 2936, 2862, 1632, 1597, 1574, 1485, 1431, 1331, 1285, 1254, 1180, 1053, 995, 941, 795, 775, 683  $\text{cm}^{-1}$ ; HRMS (ESI) calcd for  $\text{C}_{88}\text{H}_{92}^{81}\text{BrMgN}_8\text{O}_4$  476.5418, found 476.5147 ( $[\text{M} - 3\text{Br}]^{3+}$ ) (cluster peaks based on isotope abundance).

## [2] Coupling Reaction of $\text{CO}_2$ with Epoxide.

**General Procedure.** A 30-mL stainless autoclave was charged with epoxide (10.0 mmol), catalyst (amount indicated in the text), and then  $\text{CO}_2$  (initial pressure indicated in the text). The mixture was heated with stirring at a constant temperature for a reaction time. The reactor was then cooled in an ice bath for 30 min, and excess  $\text{CO}_2$  was released carefully. The NMR yield was determined by using 2-methoxynaphthalene as an internal standard, or the product was purified by silica gel column chromatography.

**4-*n*-Butyl-1,3-dioxolan-2-one (3a).**<sup>3</sup> 99% yield; colorless oil;  $^1\text{H}$  NMR ( $\text{CDCl}_3$ , 600 MHz)  $\delta$  0.93 (t,  $J = 7.1$  Hz, 3H), 1.33–1.49 (m, 4H), 1.66–1.72 (m, 1H), 1.79–1.85 (m, 1H), 4.07 (dd,  $J = 7.6, 8.4$  Hz, 1H), 4.52 (dd,  $J = 7.6, 8.4$  Hz, 1H), 4.70 (dq,  $J = 5.5, 7.6$  Hz, 1H);  $^{13}\text{C}$  NMR ( $\text{CDCl}_3$ , 150 MHz)  $\delta$  13.6, 22.1, 26.2, 33.3, 69.3, 77.0, 155.0; IR (neat) 2959, 2936, 2870, 1798, 1466, 1385, 1173, 1123, 1065, 775, 717  $\text{cm}^{-1}$ .

**4-Methyl-1,3-dioxolan-2-one (3b).**<sup>3</sup> 99% yield; colorless oil;  $^1\text{H}$  NMR ( $\text{CDCl}_3$ , 600 MHz)  $\delta$  1.50 (d,  $J = 6.6$  Hz, 3H), 4.03 (dd,  $J = 7.5, 8.3$  Hz, 1H), 4.55 (dd,  $J = 7.5, 8.3$  Hz, 1H), 4.83–4.88 (m, 1H);  $^{13}\text{C}$  NMR ( $\text{CDCl}_3$ , 150 MHz)  $\delta$  19.3, 70.6, 73.5, 155.0; IR (neat) 2990, 2936, 1790, 1558, 1485, 1454, 1389, 1354, 1180, 1119, 1049, 775, 710  $\text{cm}^{-1}$ .

**4-*n*-Octyl-1,3-dioxolan-2-one (3c).**<sup>3</sup> 93% yield; colorless oil;  $^1\text{H}$  NMR ( $\text{CDCl}_3$ , 600 MHz)  $\delta$  0.88 (t,  $J = 7.0$  Hz, 3H), 1.28–1.51 (m, 12H), 1.65–1.70 (m, 1H), 1.78–1.84 (m, 1H), 4.07 (dd,  $J = 7.7, 8.2$  Hz, 1H), 4.52 (dd,  $J = 7.7, 8.2$  Hz, 1H), 4.70 (dq,  $J = 5.7, 7.7$  Hz, 1H);  $^{13}\text{C}$  NMR ( $\text{CDCl}_3$ , 150 MHz)  $\delta$  13.9, 22.5, 24.2, 28.96, 28.99, 29.2, 31.6, 33.7, 69.3, 77.0, 155.0; IR (neat) 2928, 2858, 1798, 1458, 1385, 1169, 1065, 775, 721  $\text{cm}^{-1}$ .

**(*R*)-4-Phenyl-1,3-dioxolan-2-one ((*R*)-3d).**<sup>3</sup> 93% yield; white solid; mp 68–69 °C (lit.<sup>4</sup> 49–52 °C); >99% ee;  $[\alpha]_{\text{D}}^{28} = -48.5$  ( $c$  1.00,  $\text{CHCl}_3$ ), lit.<sup>5</sup>  $[\alpha]_{\text{D}}^{20} = -51.8$  ( $c$  1.0,  $\text{CHCl}_3$ ) for (*R*)-3d with 99% ee;  $^1\text{H}$  NMR ( $\text{CDCl}_3$ , 600 MHz)  $\delta$  4.35 (dd,  $J = 8.2, 8.4$  Hz, 1H), 4.80 (dd,  $J = 8.2, 8.4$  Hz, 1H), 5.68 (t,  $J = 8.2$  Hz, 1H), 7.36–7.37 (m, 2H), 7.43–7.47 (m, 3H);  $^{13}\text{C}$  NMR ( $\text{CDCl}_3$ , 150 MHz)  $\delta$  71.1, 78.0, 125.8, 129.2, 129.7, 135.7, 154.8; IR (KBr) 2978, 2932, 1778, 1481, 1458, 1396, 1358, 1323, 1177, 1053, 961, 907, 764, 702  $\text{cm}^{-1}$ ; HPLC: Chiralcel OD-H, hexane/*i*-PrOH = 9:1, flow rate 1.0 mL/min, detection 254 nm, (*R*) 21.5 min, (*S*) 25.4 min.



**4-Chloromethyl-1,3-dioxolan-2-one (3e).**<sup>3</sup> 95% yield; colorless oil; <sup>1</sup>H NMR (CDCl<sub>3</sub>, 600 MHz) δ 3.72–3.78 (m, 2H), 4.42 (dd, *J* = 5.8, 8.8 Hz, 1H), 4.59 (dd, *J* = 8.3, 8.8 Hz, 1H), 4.94–4.97 (m, 1H); <sup>13</sup>C NMR (CDCl<sub>3</sub>, 150 MHz) δ 43.9, 66.8, 74.3, 154.3; IR (neat) 2986, 2924, 1794, 1543, 1477, 1396, 1358, 1335, 1165, 1072, 768, 718, 667 cm<sup>-1</sup>.

**4-Methoxymethyl-1,3-dioxolan-2-one (3f).**<sup>3</sup> 95% yield; colorless oil; <sup>1</sup>H NMR (CDCl<sub>3</sub>, 600 MHz) δ 3.43 (s, 3H), 3.58 (dd, *J* = 3.9, 10.9 Hz, 1H), 3.64 (dd, *J* = 3.9, 10.9 Hz, 1H), 4.38 (dd, *J* = 7.3, 8.4 Hz, 1H), 4.49 (t, *J* = 8.4 Hz, 1H), 4.78–4.82 (m, 1H); <sup>13</sup>C NMR (CDCl<sub>3</sub>, 150 MHz) δ 59.6, 66.1, 71.4, 74.9, 154.9; IR (neat) 2993, 2939, 2897, 2824, 1794, 1543, 1474, 1396, 1362, 1339, 1173, 1134, 1076, 1049, 957, 775, 714 cm<sup>-1</sup>.

**4-Phenoxymethyl-1,3-dioxolan-2-one (3g).**<sup>6</sup> 98% yield; white solid; mp 99–100 °C (lit.<sup>4</sup> 98–100 °C); <sup>1</sup>H NMR (CDCl<sub>3</sub>, 600 MHz) δ 4.16 (dd, *J* = 4.0, 10.5 Hz, 1H), 4.24 (dd, *J* = 4.0, 10.5 Hz, 1H), 4.55 (dd, *J* = 5.9, 8.5 Hz, 1H), 4.62 (t, *J* = 8.5 Hz, 1H), 5.02–5.05 (m, 1H), 6.91 (d, *J* = 7.8 Hz, 2H), 7.02 (t, *J* = 7.8 Hz, 1H), 7.31 (t, *J* = 7.8 Hz, 2H); <sup>13</sup>C NMR (CDCl<sub>3</sub>, 150 MHz) δ 66.2, 66.8, 74.1, 114.5, 121.9, 129.7, 154.6, 157.7; IR (KBr) 2928, 1805, 1601, 1493, 1458, 1396, 1312, 1250, 1169, 1092, 1057, 1015, 760, 694 cm<sup>-1</sup>.

**4-Hydroxymethyl-1,3-Dioxolan-2-one (3h).**<sup>7</sup> 87% yield; colorless oil; <sup>1</sup>H NMR (*d*<sub>6</sub>-acetone, 600 MHz) δ 3.68–3.72 (m, 1H), 3.85–3.89 (m, 1H), 4.39–4.42 (m, 2H), 4.56 (t, *J* = 8.4 Hz, 1H), 4.84–4.87 (m, 1H); <sup>13</sup>C NMR (*d*<sub>6</sub>-acetone, 150 MHz) δ 62.0, 66.6, 77.8, 156.2; IR (neat) 3418, 2932, 2882, 1790, 1636, 1481, 1404, 1373, 1339, 1310, 1182, 1086, 1055, 984, 841, 775, 718 cm<sup>-1</sup>.

**4-Vinyl-1,3-dioxolan-2-one (3i).**<sup>8</sup> 81% yield; colorless oil; <sup>1</sup>H NMR (CDCl<sub>3</sub>, 600 MHz) δ 4.16 (dd, *J* = 7.6, 8.4 Hz, 1H), 4.60 (t, *J* = 8.4 Hz, 1H), 5.12 (q, *J* = 7.6 Hz, 1H), 5.45 (d, *J* = 10.4 Hz, 1H), 5.52 (d, *J* = 17.1 Hz, 1H), 5.90 (ddd, *J* = 7.6, 10.4, 17.1 Hz, 1H); <sup>13</sup>C NMR (CDCl<sub>3</sub>, 150 MHz) δ 68.9, 77.1, 120.8, 132.0, 154.7; IR (neat) 3094, 2993, 2932, 1794, 1543, 1485, 1435, 1385, 1327, 1169, 1065, 991, 949, 772, 725 cm<sup>-1</sup>.

***trans*-4-*n*-Butyl-5-deuterio-1,3-dioxolan-2-one (3j).**<sup>9</sup> 72% yield; colorless oil; <sup>1</sup>H NMR (CDCl<sub>3</sub>, 600 MHz) δ 0.93 (t, *J* = 7.2 Hz, 3H), 1.32–1.49 (m, 4H), 1.66–1.72 (m, 1H), 1.79–1.85 (m, 1H), 4.06 (d, *J* = 7.0 Hz, 1H), 4.70 (q, *J* = 7.0 Hz, 1H); <sup>13</sup>C NMR (CDCl<sub>3</sub>, 150 MHz) δ 13.5, 22.0, 26.2, 33.2, 68.9 (t, *J*<sub>CD</sub> = 23.7 Hz), 76.9, 155.0; IR (neat) 2962, 2936, 2870, 1794, 1543, 1466, 1366, 1304, 1177, 1061, 775, 714 cm<sup>-1</sup>.

## References

- 1 Y. Zhao, Y. Zhou, K. M. O'Boyle and P. V. Murphy, *Bioorg. Med. Chem.*, 2008, **16**, 6333–6337.
- 2 A. H. Éll, G. Csjernyk, V. F. Slagt, J.-E. Bäckvall, S. Berner, C. Puglia, G. Ledung and S. Oscarsson, *Eur. J. Org. Chem.*, 2006, 1193–1199.
- 3 Y. Tsutsumi, K. Yamakawa, M. Yoshida, T. Ema and T. Sakai, *Org. Lett.*, 2010, **12**, 5728–5731.
- 4 W. Clegg, R. W. Harrington, M. North and R. Pasquale, *Chem. Eur. J.*, 2010, **16**, 6828–6843.
- 5 Y. Du, J.-Q. Wang, J.-Y. Chen, F. Cai, J.-S. Tian, D.-L. Kong and L.-N. He, *Tetrahedron Lett.*, 2006, **47**, 1271–1275.
- 6 X.-Y. Dou, J.-Q. Wang, Y. Du, E. Wang and L.-N. He, *Synlett*, 2007, 3058–3062.
- 7 G. Rokicki, P. Rakoczy, P. Parzuchowski and M. Sobiecki, *Green Chem.*, 2005, **7**, 529–539.
- 8 T. Fujinami, T. Suzuki, M. Kamiya, S. Fukuzawa and S. Sakai, *Chem. Lett.*, 1985, 199–200.
- 9 Y.-M. Shen, W.-L. Duan and M. Shi, *Eur. J. Org. Chem.*, 2004, 3080–3089.

**[3] Screening of Two-component Catalytic Systems.**

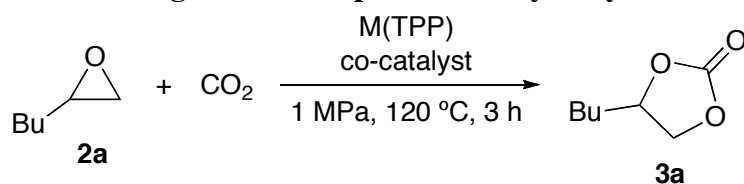

**Table S1.** Screening of Two-component Catalytic Systems (Data for Fig. 4).<sup>a</sup>

| entry | M(TPP)  | co-catalyst | yield (%) <sup>b</sup> |
|-------|---------|-------------|------------------------|
| 1     | Mg(TPP) | TPPB        | 94                     |
| 2     | Mg(TPP) | TBAB        | 93                     |
| 3     | Mg(TPP) | DMAP        | 85                     |
| 4     | Mg(TPP) | PTAT        | 6                      |
| 5     | Co(TPP) | TPPB        | 7                      |
| 6     | Co(TPP) | TBAB        | 20                     |
| 7     | Co(TPP) | DMAP        | 5                      |
| 8     | Co(TPP) | PTAT        | 1                      |
| 9     | Ni(TPP) | TPPB        | 33                     |
| 10    | Ni(TPP) | TBAB        | 13                     |
| 11    | Ni(TPP) | DMAP        | 6                      |
| 12    | Ni(TPP) | PTAT        | 0.4                    |
| 13    | Cu(TPP) | TPPB        | 34                     |
| 14    | Cu(TPP) | TBAB        | 14                     |
| 15    | Cu(TPP) | DMAP        | 5                      |
| 16    | Cu(TPP) | PTAT        | 0.1                    |
| 17    | Zn(TPP) | TPPB        | 93                     |
| 18    | Zn(TPP) | TBAB        | 93                     |
| 19    | Zn(TPP) | DMAP        | 54                     |
| 20    | Zn(TPP) | PTAT        | 1                      |
| 21    | –       | TPPB        | 6                      |
| 22    | –       | TBAB        | 13                     |
| 23    | –       | DMAP        | 5                      |
| 24    | –       | PTAT        | 0.3                    |
| 25    | Mg(TPP) | –           | 0.4                    |
| 26    | Co(TPP) | –           | 0.1                    |
| 27    | Ni(TPP) | –           | 0                      |
| 28    | Cu(TPP) | –           | 0.1                    |
| 29    | Zn(TPP) | –           | 0.5                    |

<sup>a</sup> Conditions: **2a** (1.00 g, 10.0 mmol), M(TPP) (0.010 mmol, 0.1 mol %), co-catalyst (0.010 mmol, 0.1 mol %), CO<sub>2</sub> (1.0 MPa), 120 °C, 3 h, in a 30-mL autoclave. <sup>b</sup> Determined by <sup>1</sup>H NMR using 2-methoxynaphthalene as an internal standard.

#### [4] Summary of Reported Porphyrin Catalysts.

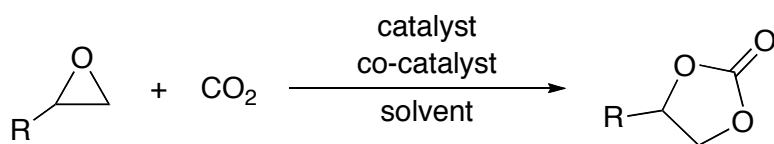

**Table S2.** Two-component Catalytic Systems with Metalloporphyrins.

| catalyst                  | co-catalyst<br>(equiv) <sup>a</sup> | R                  | CO <sub>2</sub><br>(MPa) | solvent                         | temp.<br>(°C) | time<br>(h) | yield<br>(%) | TON   | ref. |
|---------------------------|-------------------------------------|--------------------|--------------------------|---------------------------------|---------------|-------------|--------------|-------|------|
| Cr(TPP)(O)                | <i>N</i> -MeIm <sup>b</sup><br>(8)  | Me                 | 5.2                      | –                               | 80            | 48          | 95           | 7,300 | 1    |
| Co(TPP)(Cl)               | DMAP<br>(2)                         | Me                 | 1.7                      | CH <sub>2</sub> Cl <sub>2</sub> | 120           | 1           | 42           | 1,100 | 2    |
| Cu(TPP)                   | DMAP<br>(1)                         | CH <sub>2</sub> Cl | 0.69                     | CH <sub>2</sub> Cl <sub>2</sub> | 120           | 4           | 75           | 2,000 | 3    |
| Co(TPP)(OAc)              | PTAT<br>(2)                         | Me                 | 0.69                     | –                               | 25            | 3           | 90           | 900   | 4    |
| Sn(TPP)(OTf) <sub>2</sub> | TBPB <sup>c</sup><br>(50)           | Hex                | 0.1                      | DMF                             | 50            | 3           | 100          | 50    | 5    |
| Mg(TPP)                   | Et <sub>3</sub> N<br>(1.25)         | CH <sub>2</sub> Cl | 1.5                      | –                               | 140           | 8           | 92           | 9,200 | 6    |

<sup>a</sup> Amount relative to catalyst. <sup>b</sup> *N*-MeIm: *N*-methylimidazole. <sup>c</sup> TBPB: tetrabutylphosphonium bromide.

#### References

- 1 W. J. Kruper and D. V. Dellar, *J. Org. Chem.*, 1995, **60**, 725–727.
- 2 R. L. Paddock, Y. Hiyama, J. M. McKay and S. T. Nguyen, *Tetrahedron Lett.*, 2004, **45**, 2023–2026.
- 3 R. Srivastava, T. H. Bennur and D. Srinivas, *J. Mol. Catal. A: Chem.*, 2005, **226**, 199–205.
- 4 L. Jin, H. Jing, T. Chang, X. Bu, L. Wang and Z. Liu, *J. Mol. Catal. A: Chem.*, 2007, **261**, 262–266.
- 5 F. Ahmadi, S. Tangestaninejad, M. Moghadam, V. Mirkhani, I. Mohammadpoor-Baltork and A. R. Khosropour, *Inorg. Chem. Commun.*, 2011, **14**, 1489–1493.
- 6 M. Wang, Y. She, X. Zhou and H. Ji, *Chin. J. Chem. Eng.*, 2011, **19**, 446–451.

**[5]  $^1\text{H}$  and  $^{13}\text{C}$  NMR Spectra.**

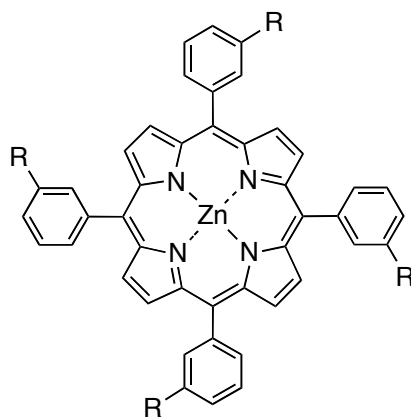

**1a:**  $\text{R} = \text{O}(\text{CH}_2)_6\text{P}^+\text{Ph}_3\text{Br}^-$

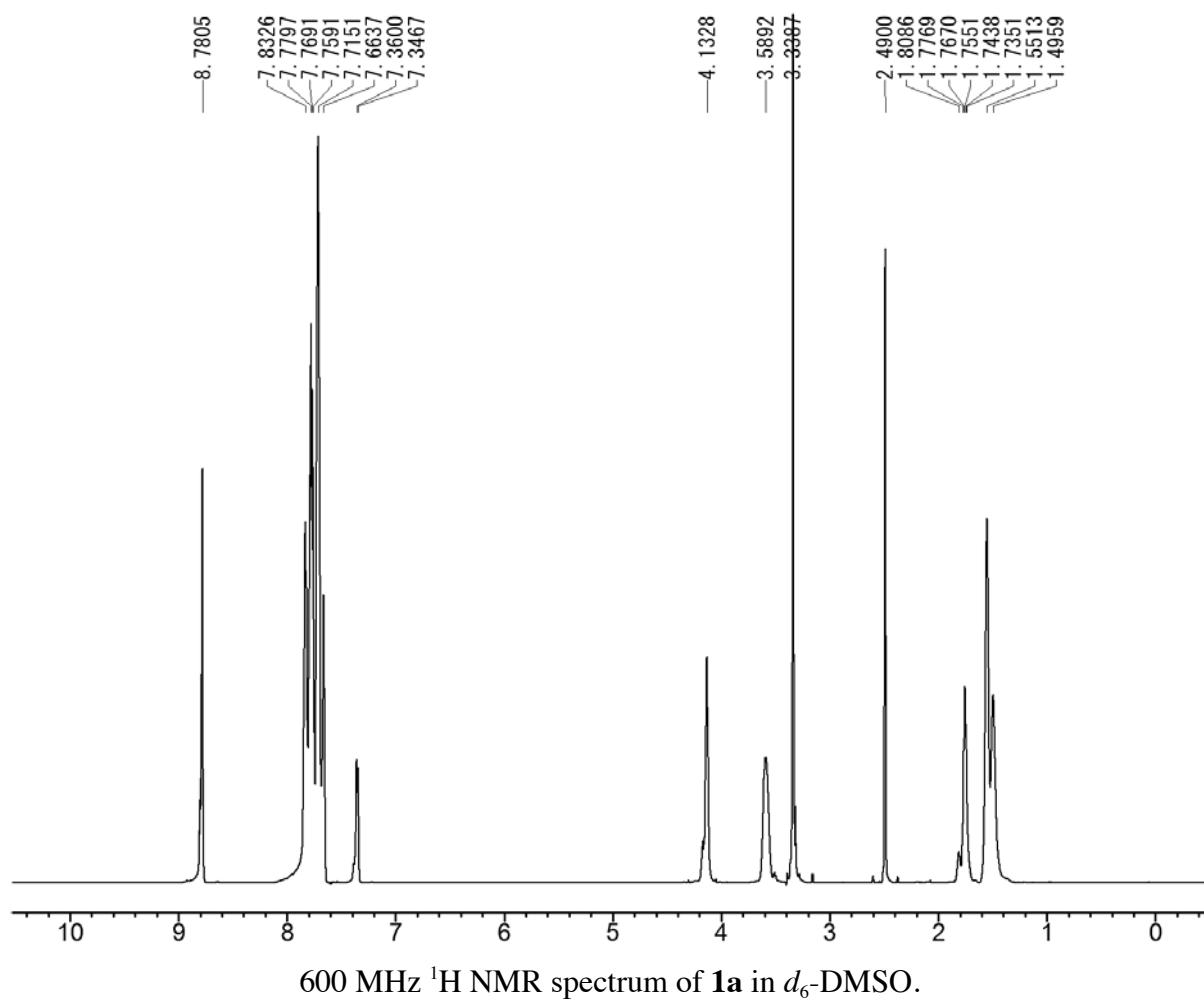

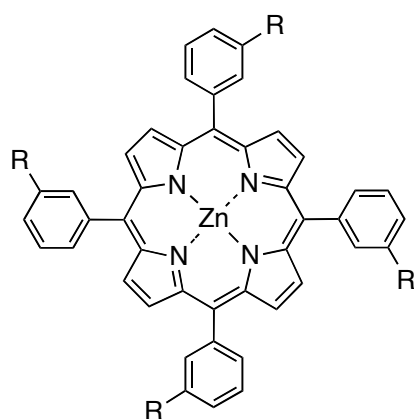

**1a:** R = O(CH<sub>2</sub>)<sub>6</sub>P<sup>+</sup>Ph<sub>3</sub>Br<sup>−</sup>

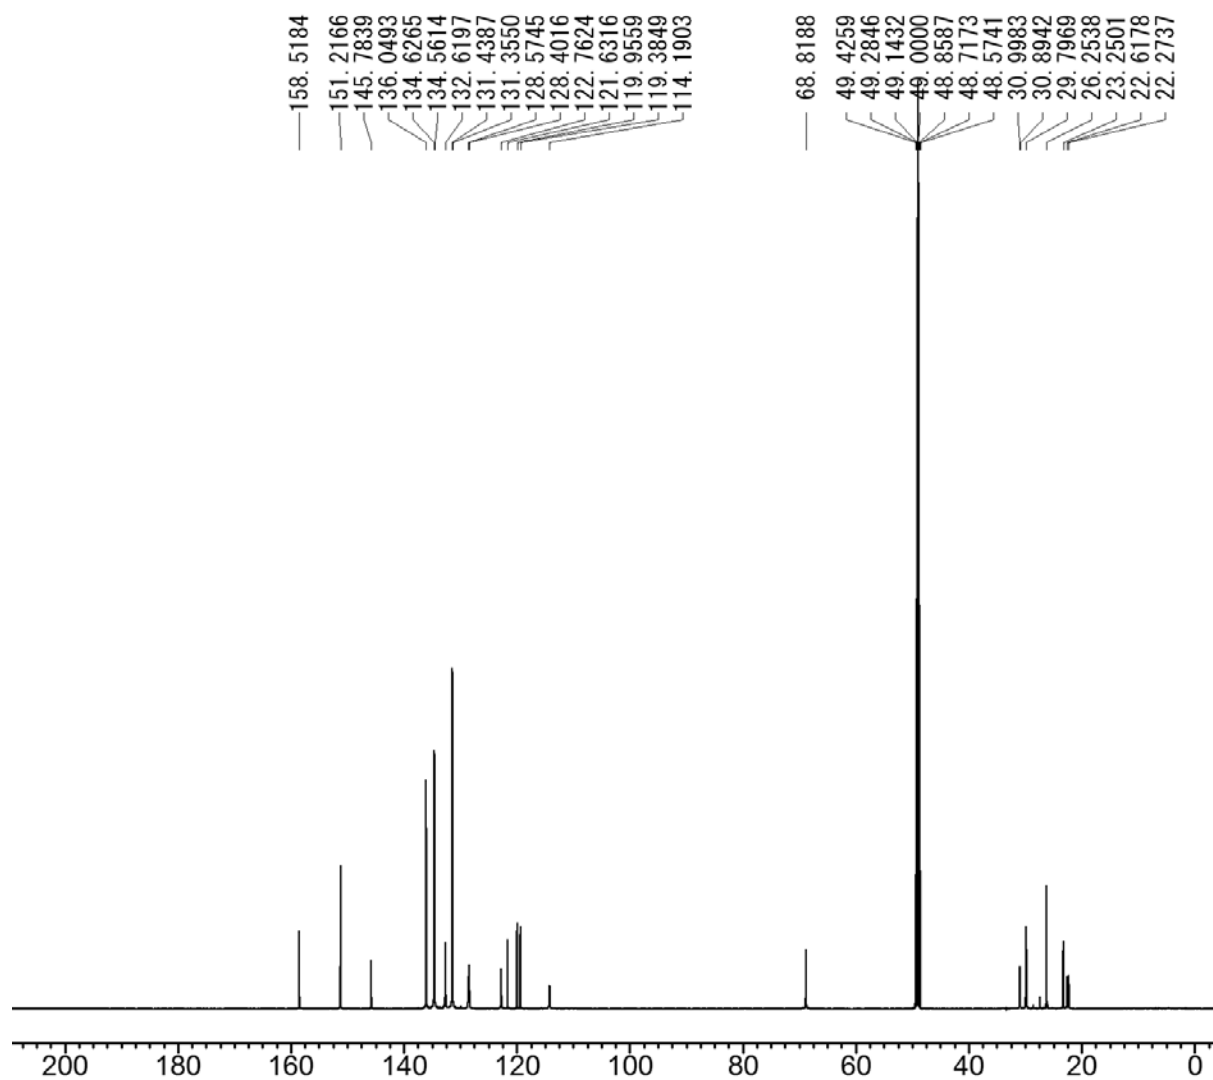

150 MHz <sup>13</sup>C NMR spectrum of **1a** in CD<sub>3</sub>OD.



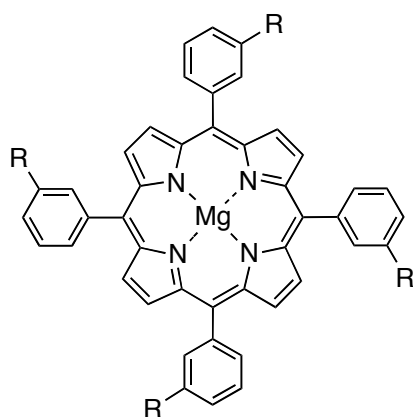

**1b**: R = O(CH<sub>2</sub>)<sub>6</sub>P<sup>+</sup>Ph<sub>3</sub>Br<sup>-</sup>

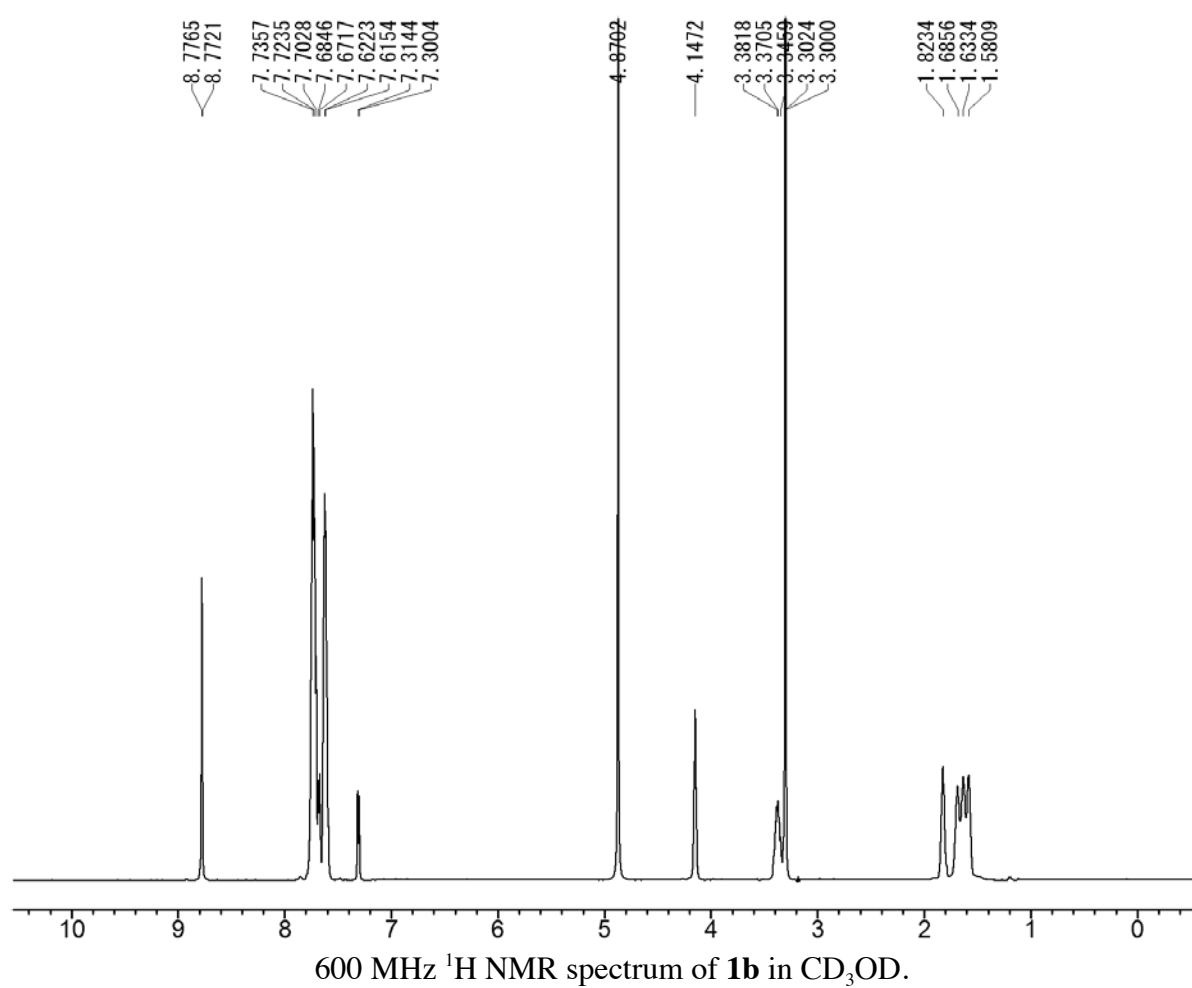

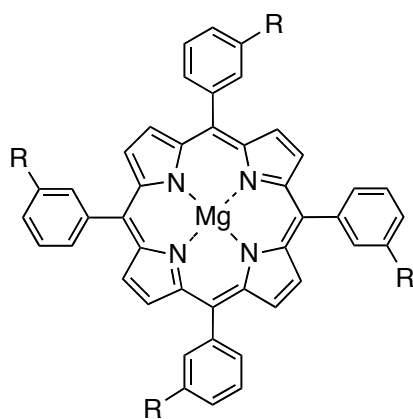

**1b**: R = O(CH<sub>2</sub>)<sub>6</sub>P<sup>+</sup>Ph<sub>3</sub>Br<sup>-</sup>

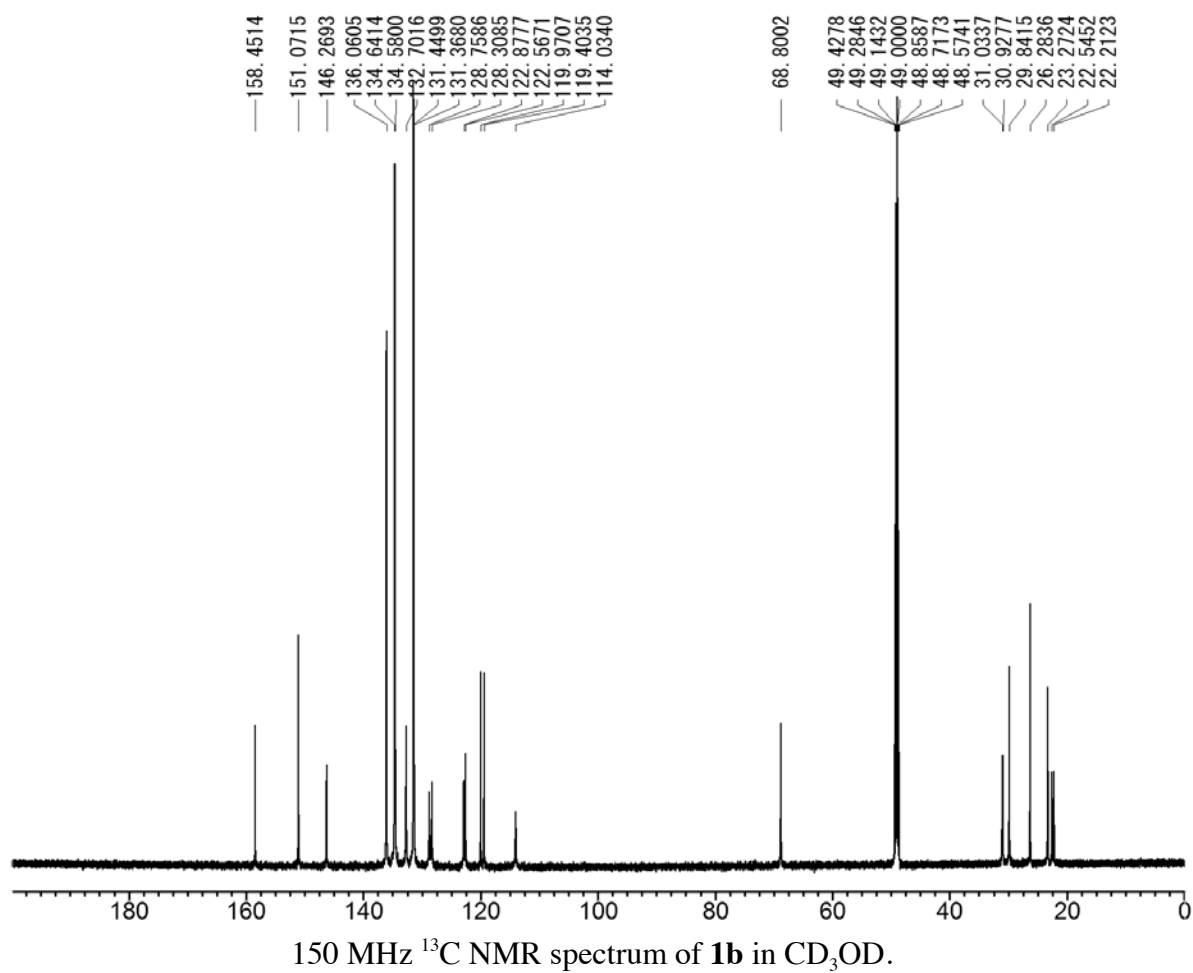

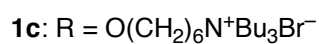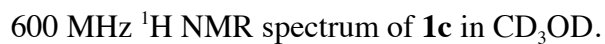

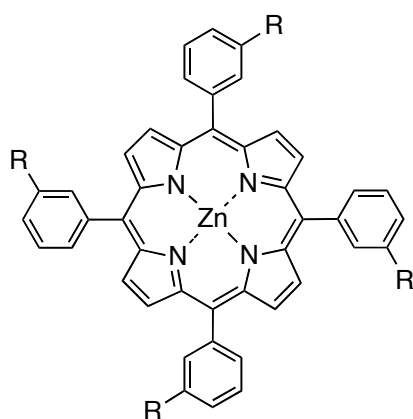

**1c:** R = O(CH<sub>2</sub>)<sub>6</sub>N<sup>+</sup>Bu<sub>3</sub>Br<sup>-</sup>

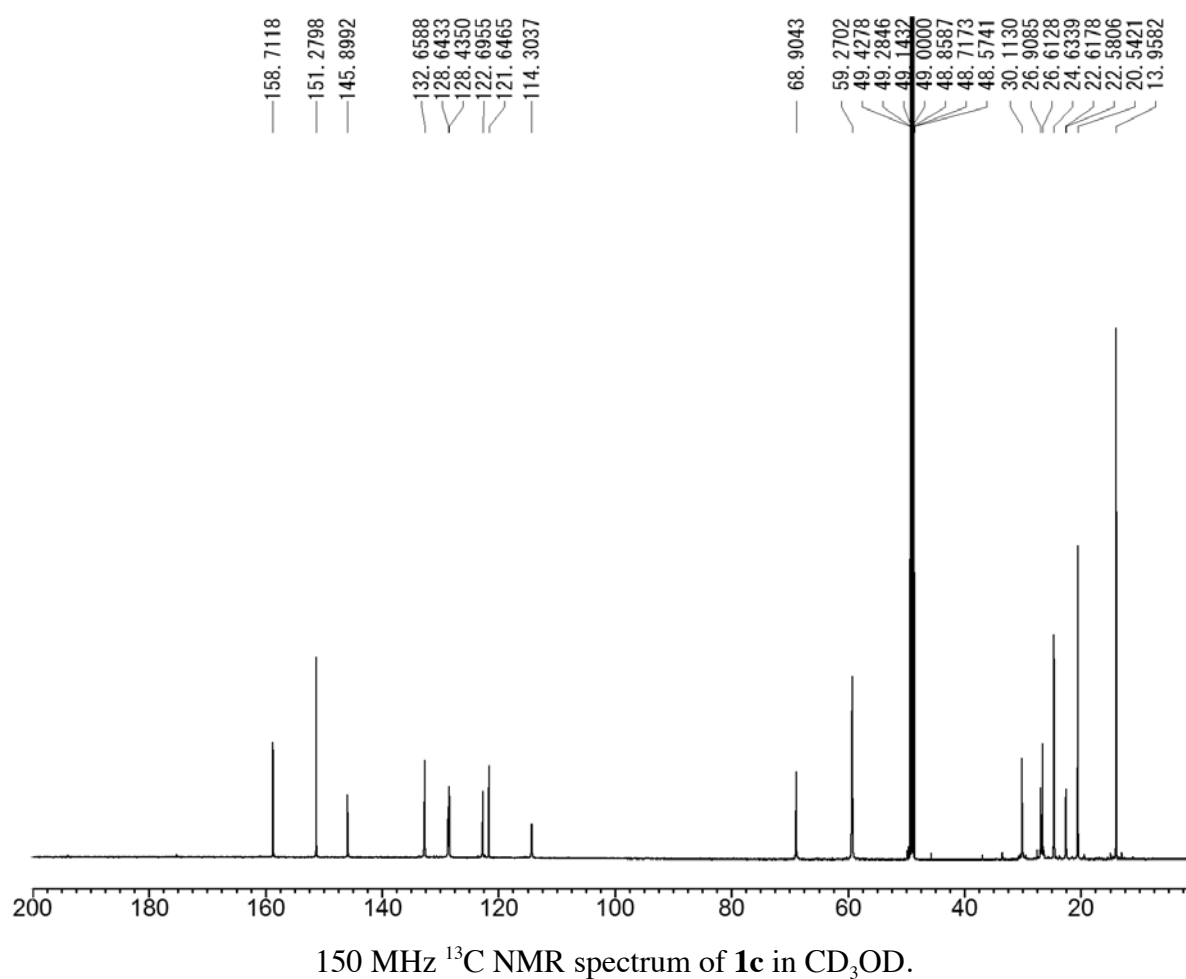

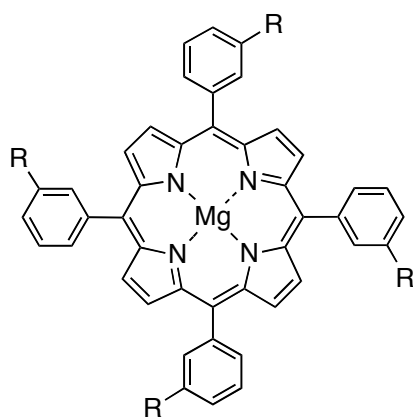

**1d**: R = O(CH<sub>2</sub>)<sub>6</sub>N<sup>+</sup>Bu<sub>3</sub>Br<sup>-</sup>

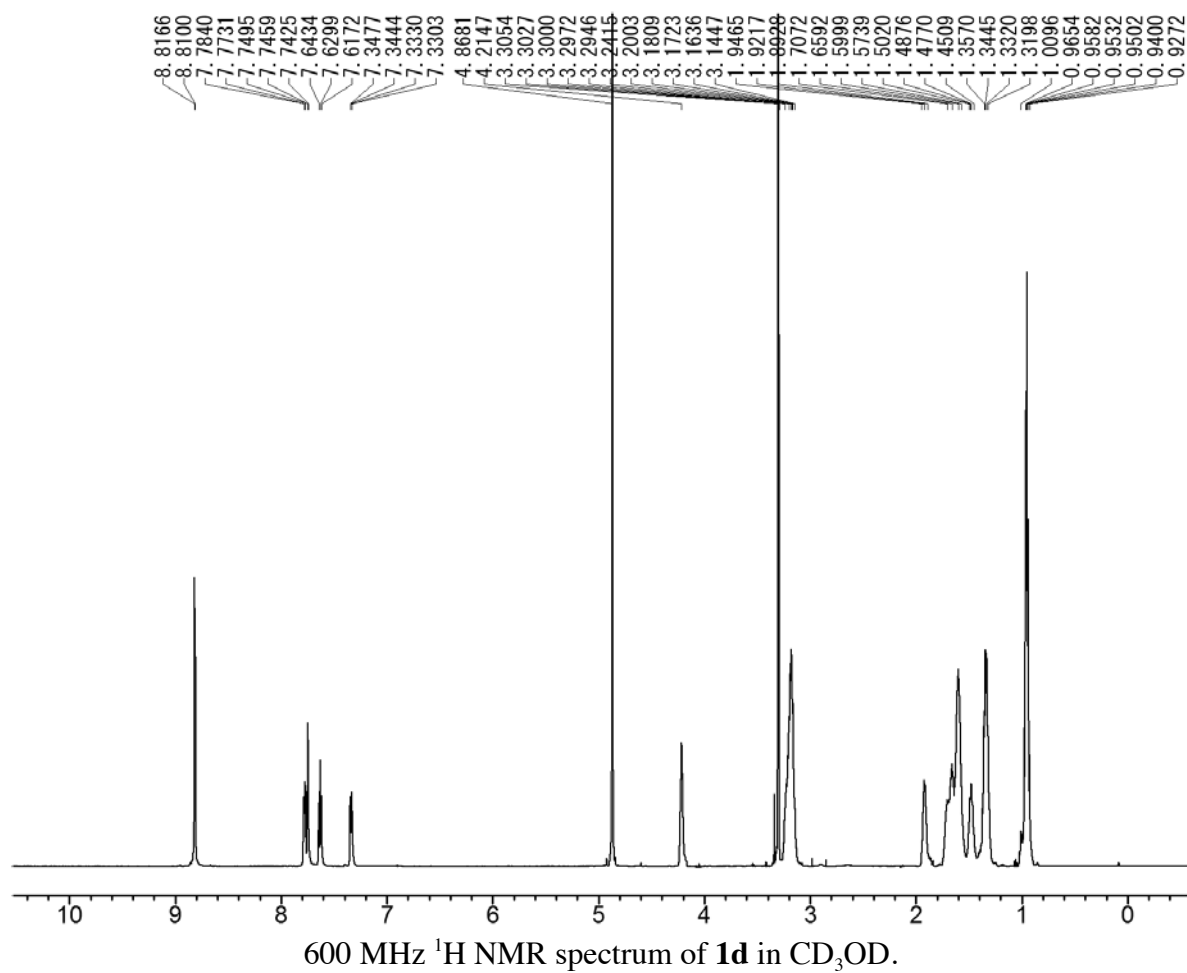

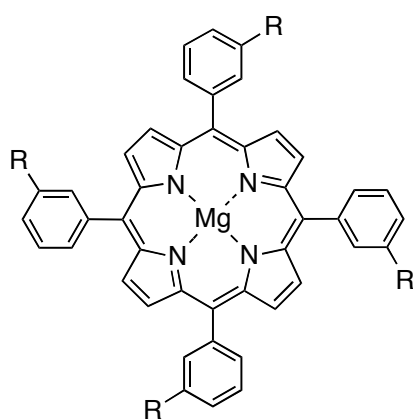

**1d**: R = O(CH<sub>2</sub>)<sub>6</sub>N<sup>+</sup>Bu<sub>3</sub>Br<sup>-</sup>

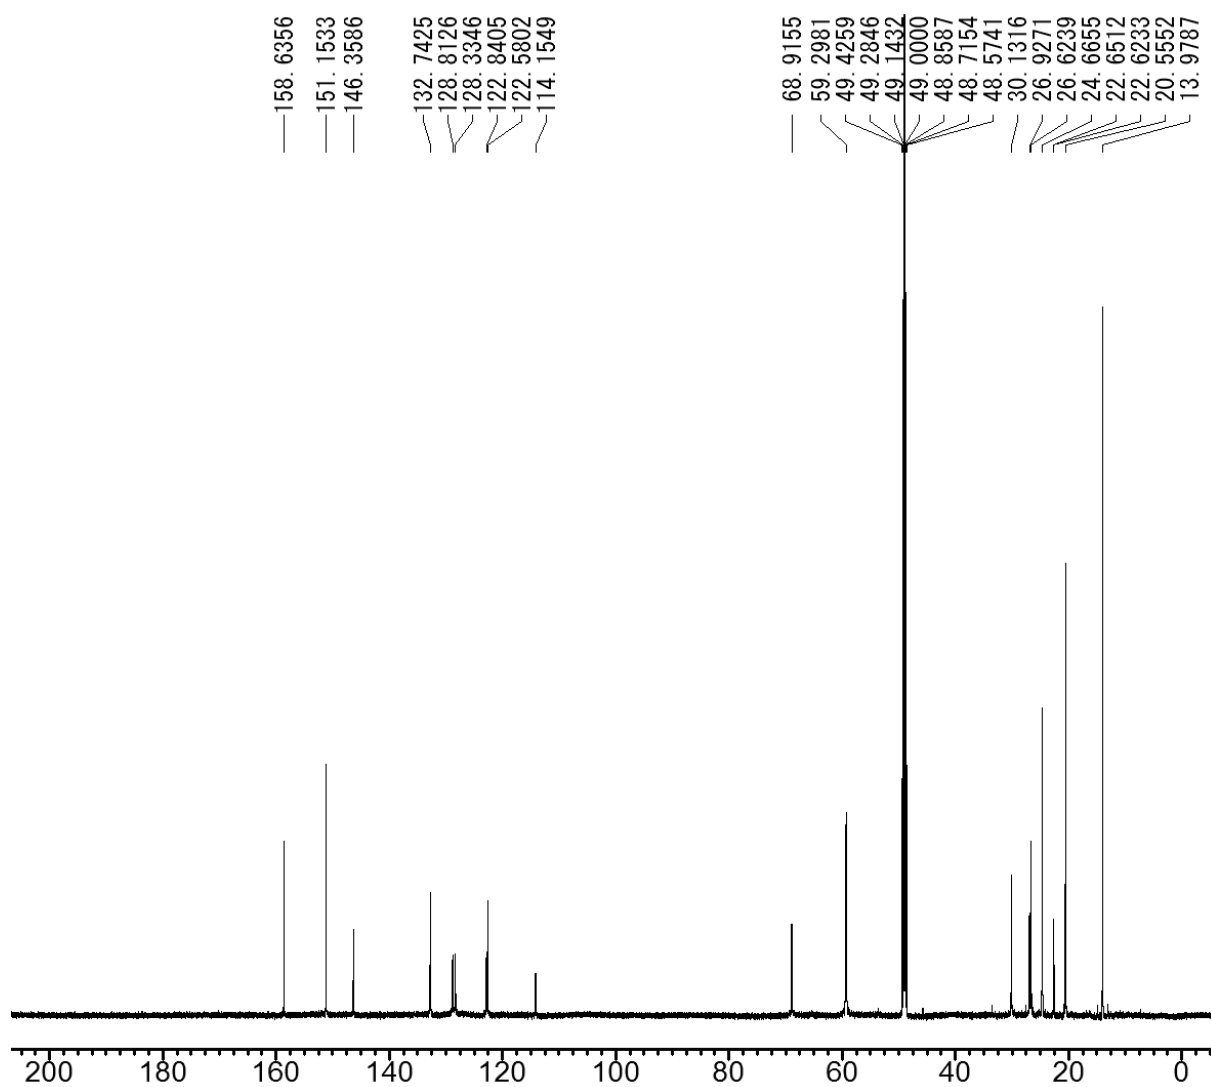

150 MHz <sup>13</sup>C NMR spectrum of **1d** in CD<sub>3</sub>OD.



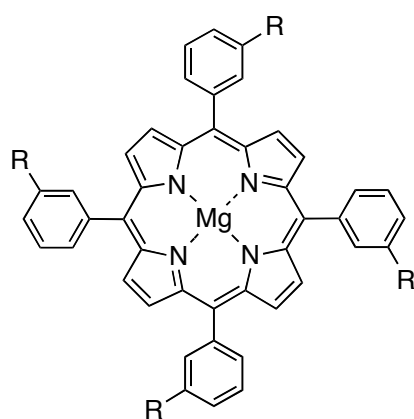

**1e**: R = O(CH<sub>2</sub>)<sub>8</sub>N<sup>+</sup>Bu<sub>3</sub>Br<sup>-</sup>

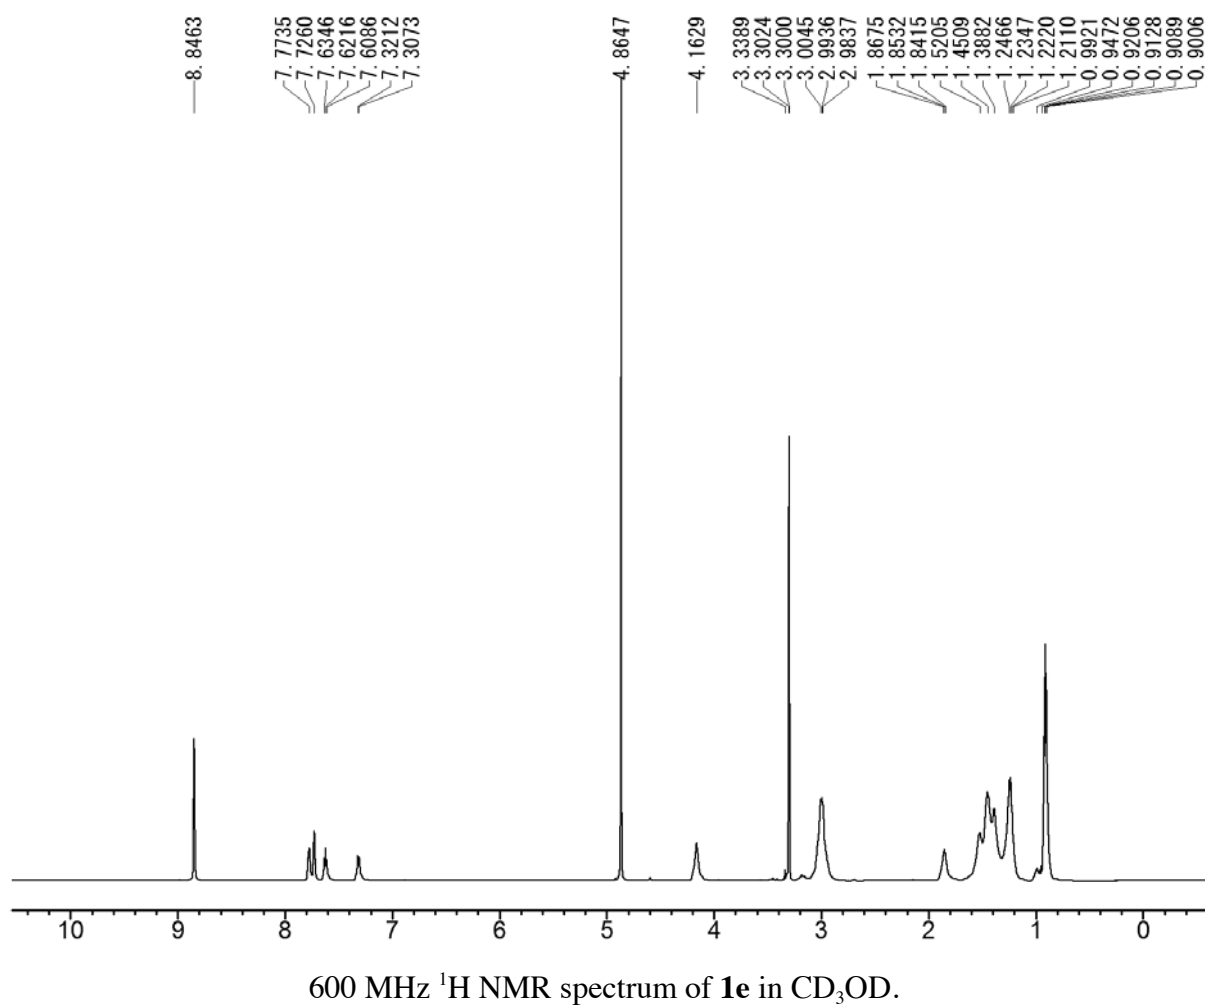



**1e**: R = O(CH<sub>2</sub>)<sub>8</sub>N<sup>+</sup>Bu<sub>3</sub>Br<sup>-</sup>

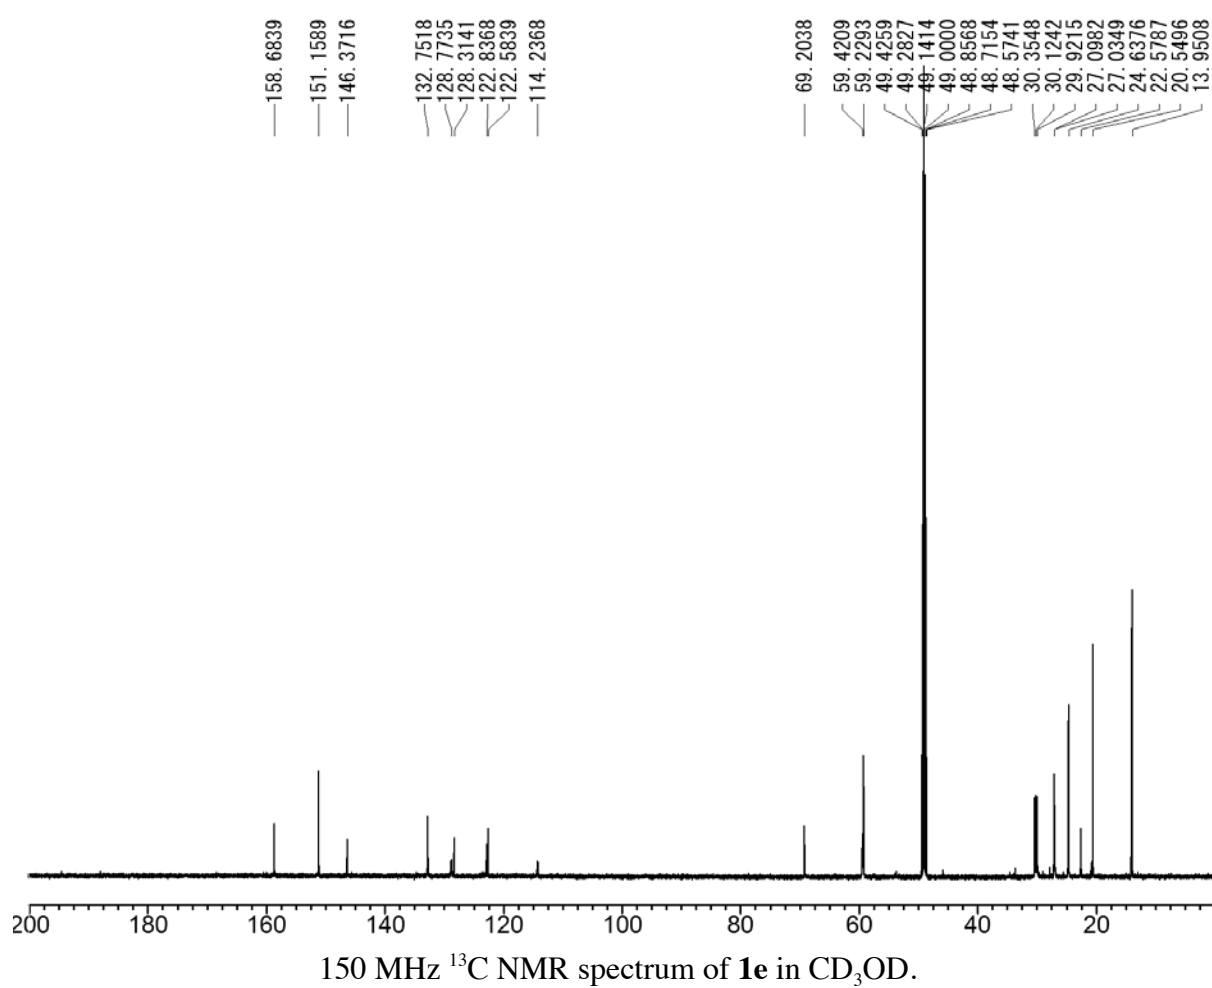

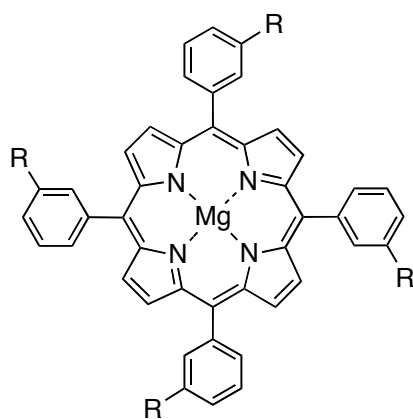

**1f**: R = O(CH<sub>2</sub>)<sub>4</sub>N<sup>+</sup>Bu<sub>3</sub>Br<sup>-</sup>

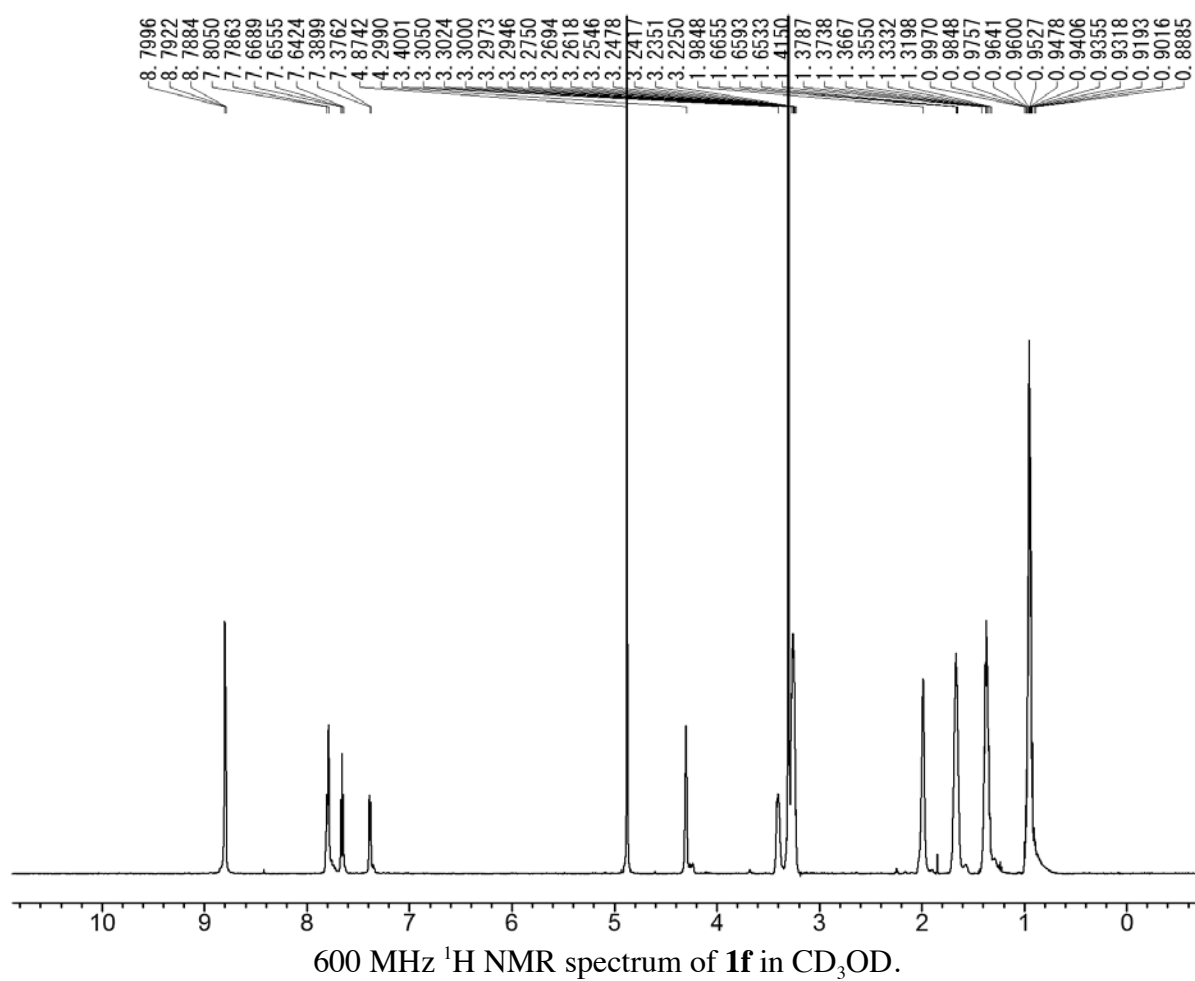

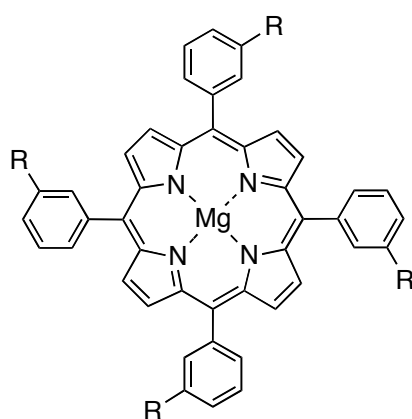

**1f**: R = O(CH<sub>2</sub>)<sub>4</sub>N<sup>+</sup>Bu<sub>3</sub>Br<sup>-</sup>

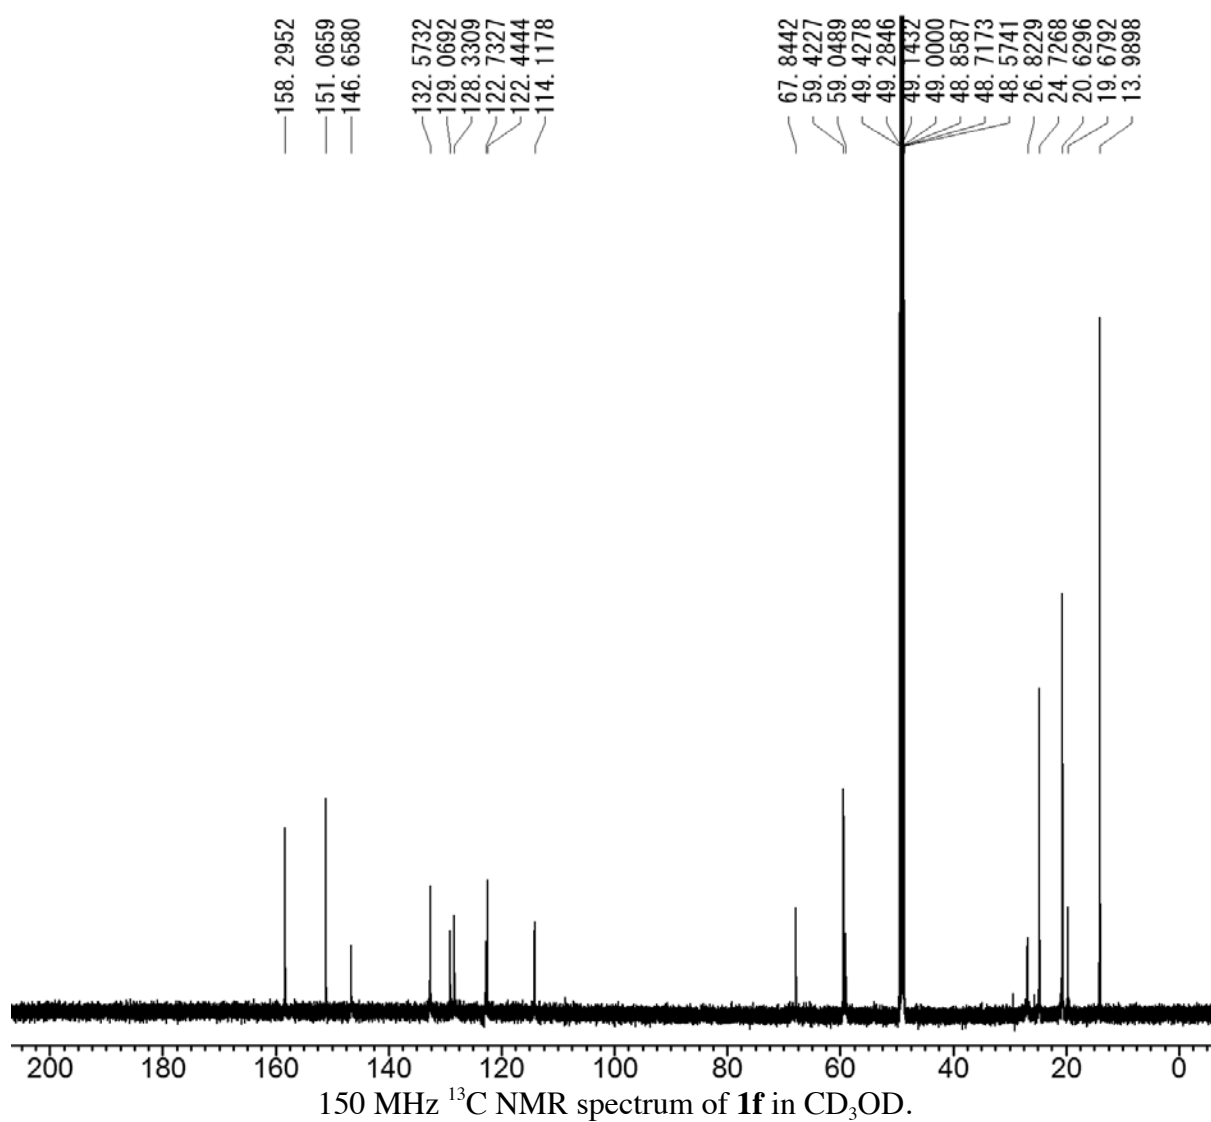

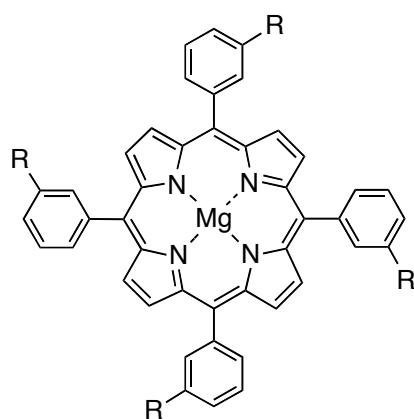

**1g**: R = O(CH<sub>2</sub>)<sub>6</sub>Py<sup>+</sup>Br<sup>-</sup>

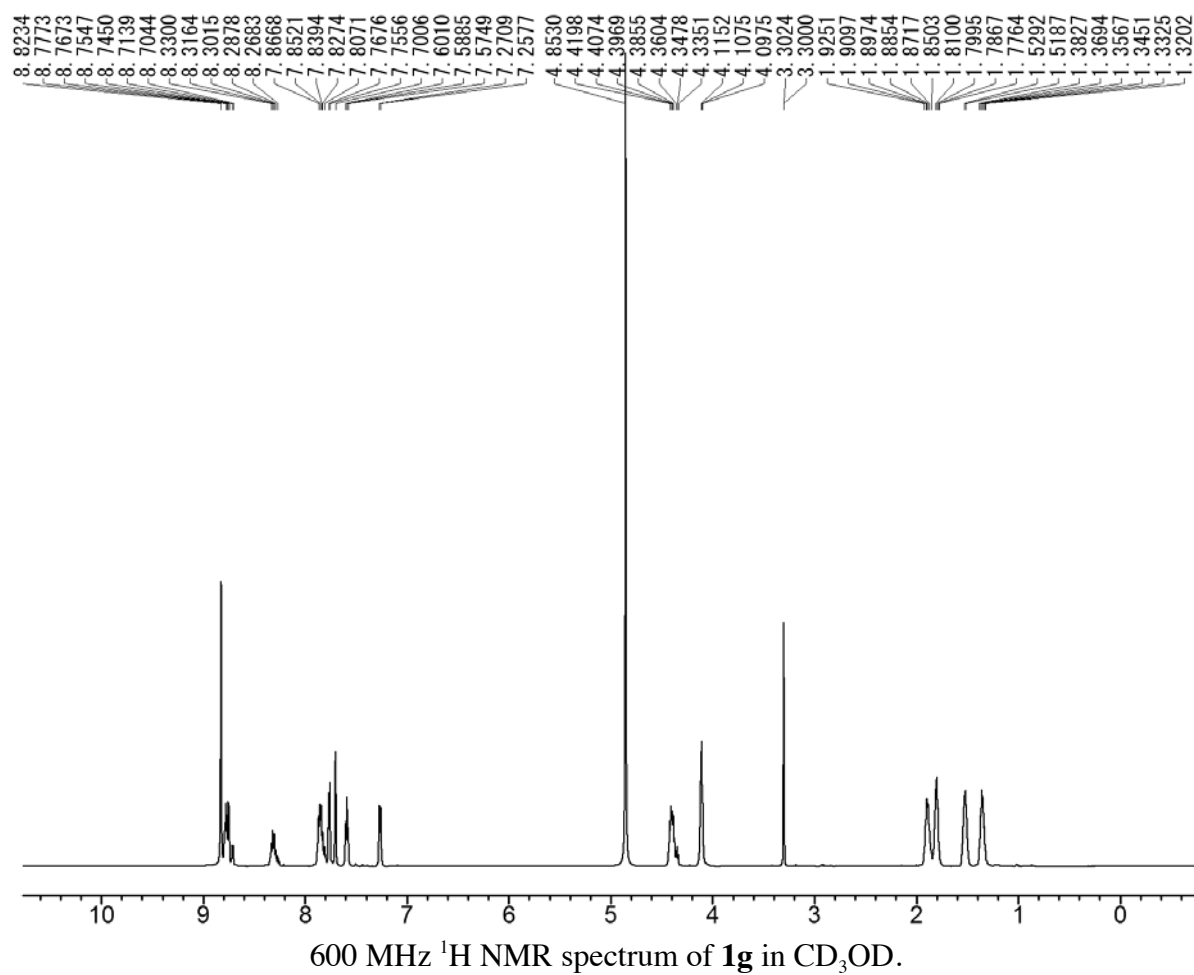



**1g**: R = O(CH<sub>2</sub>)<sub>6</sub>Py<sup>+</sup>Br<sup>-</sup>

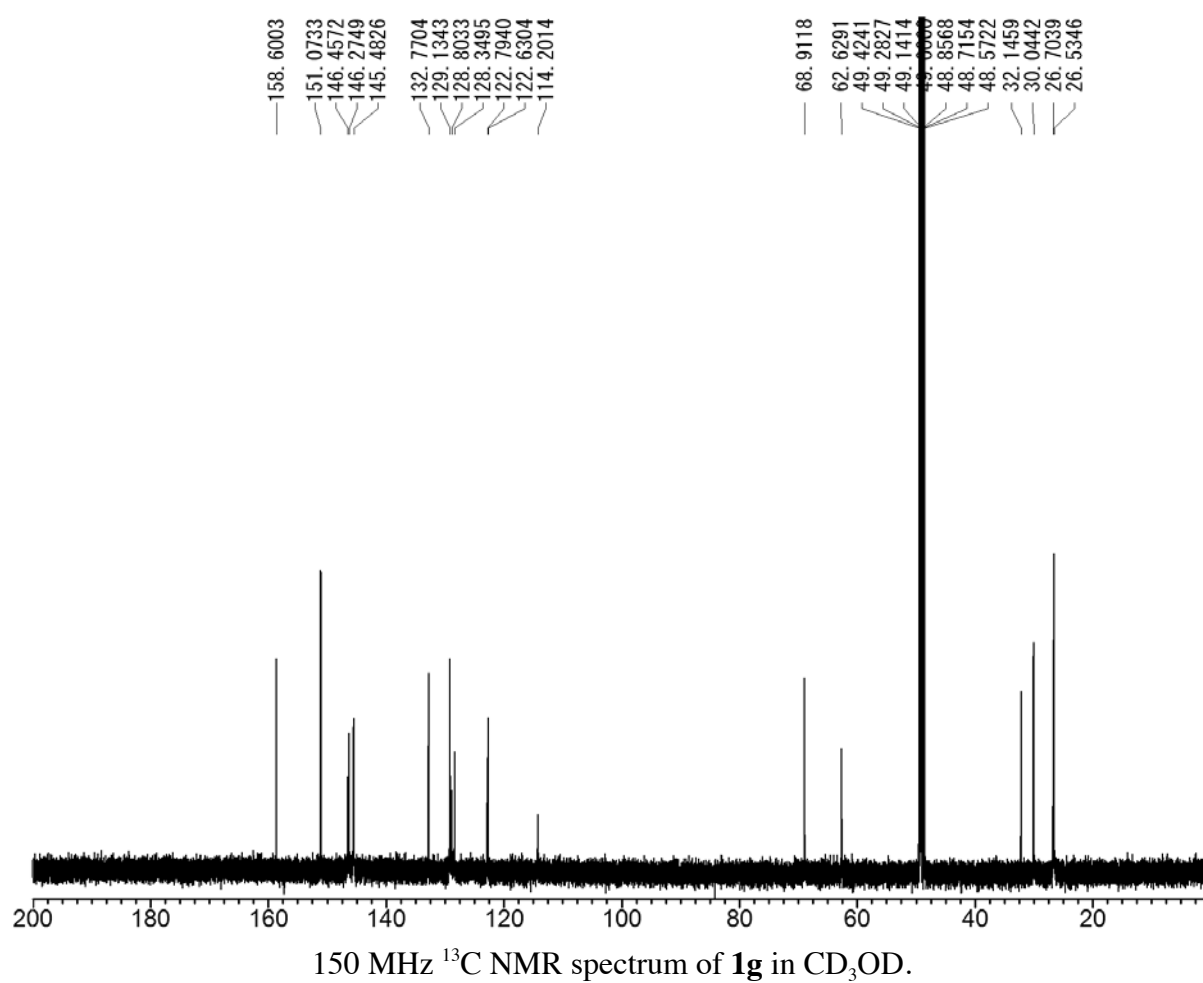



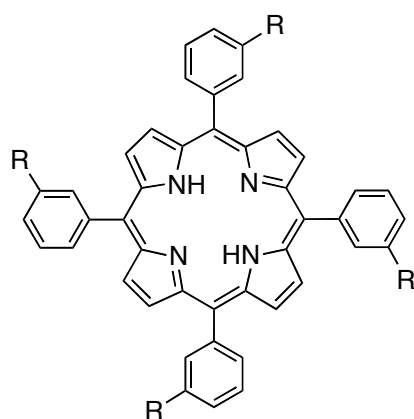

**5a:** R = O(CH<sub>2</sub>)<sub>6</sub>Br

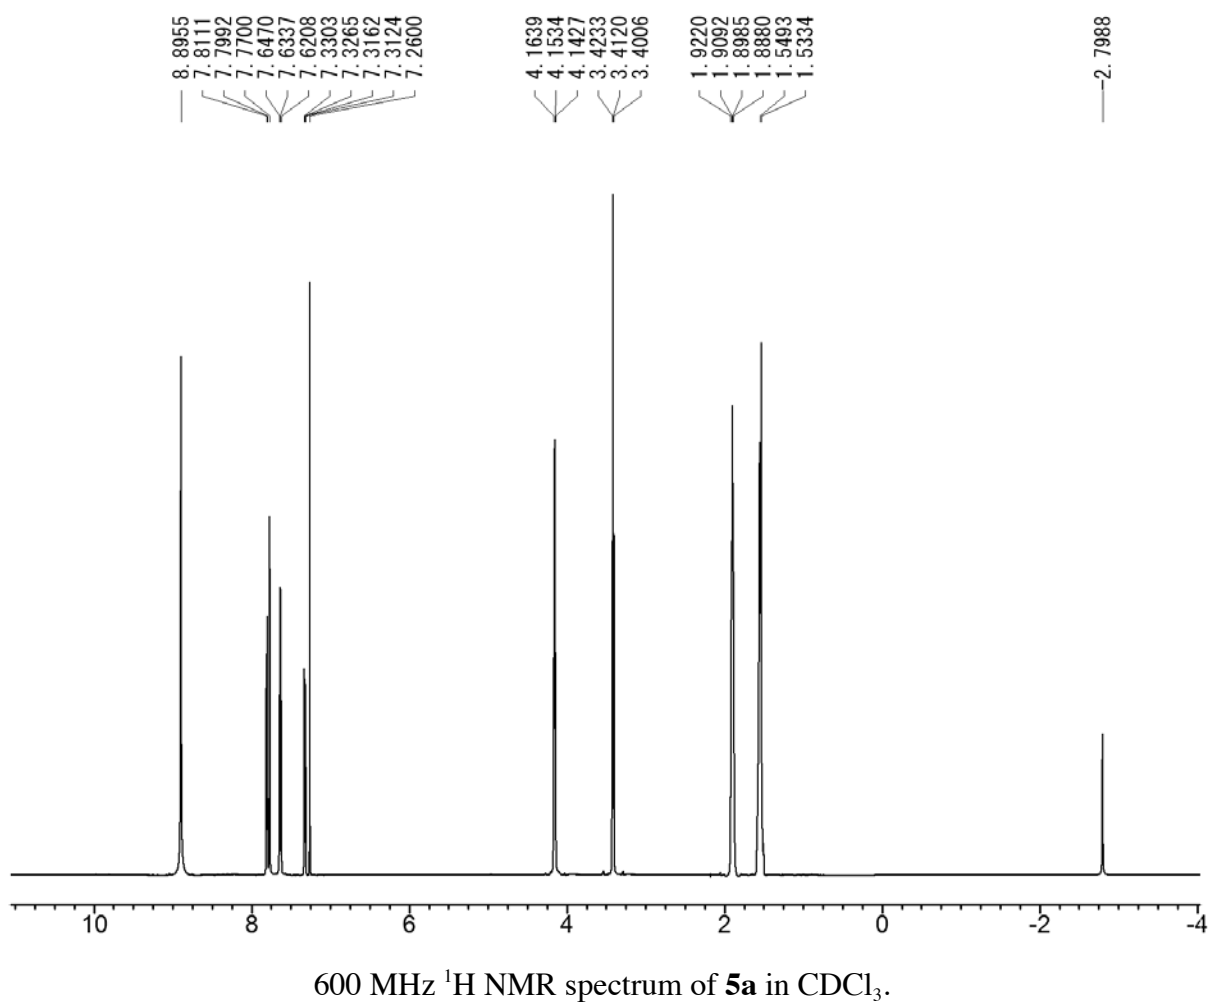



**5a:** R = O(CH<sub>2</sub>)<sub>6</sub>Br

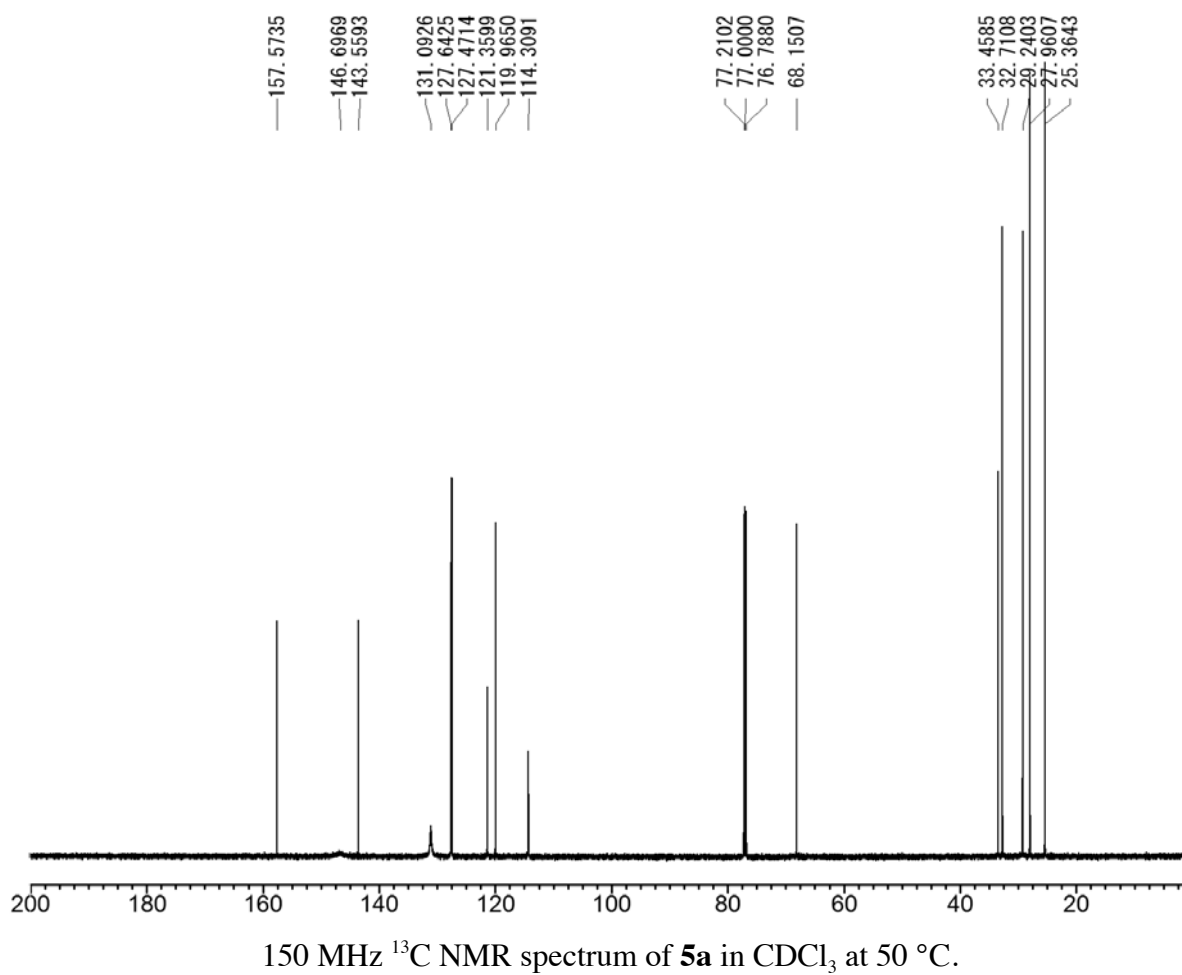

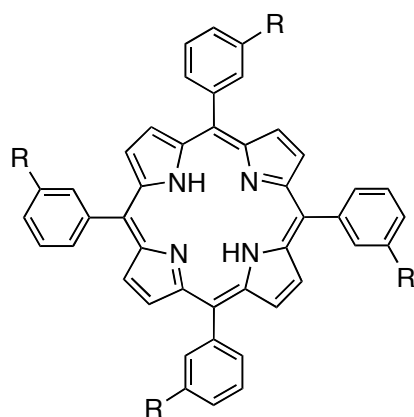

**5b**: R = O(CH<sub>2</sub>)<sub>8</sub>Br

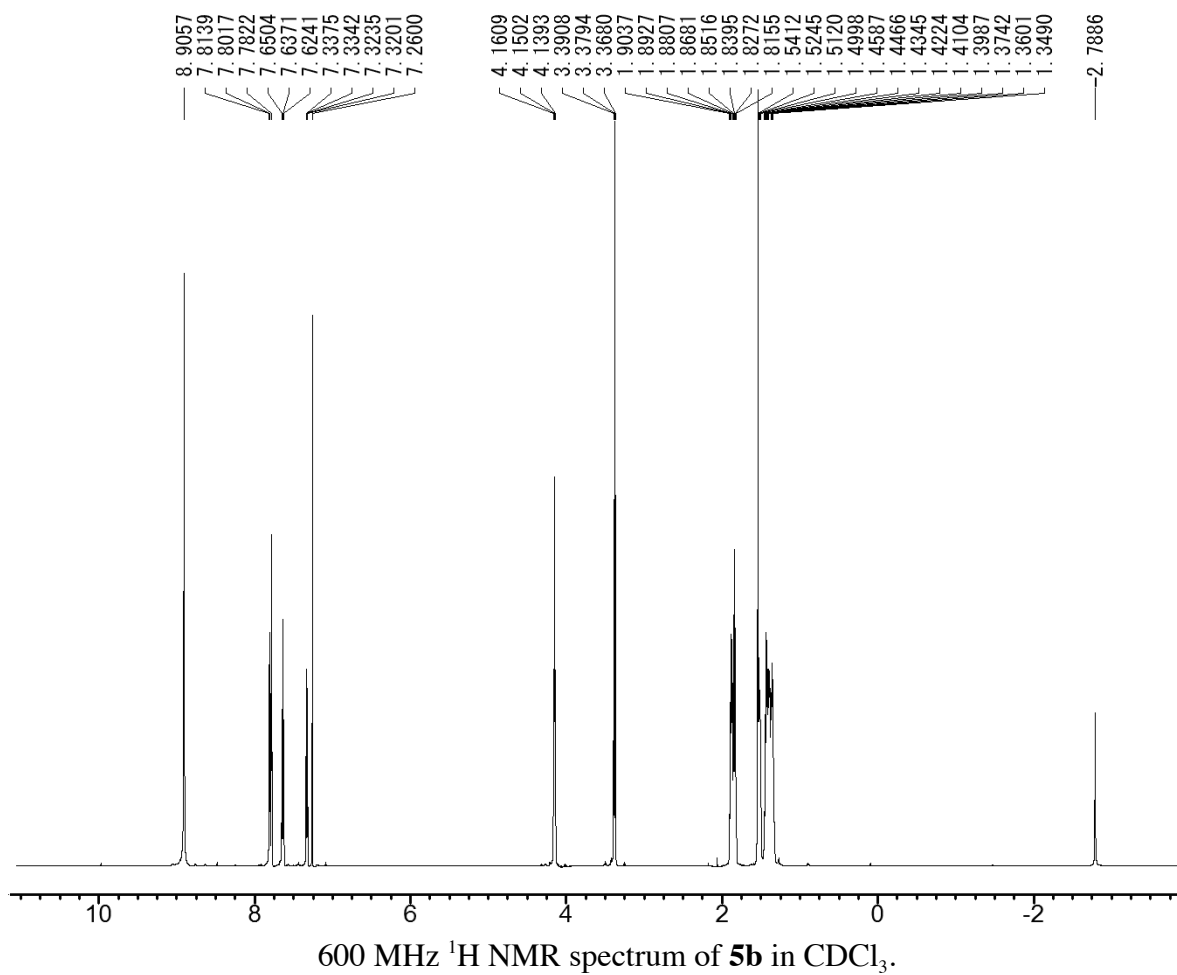

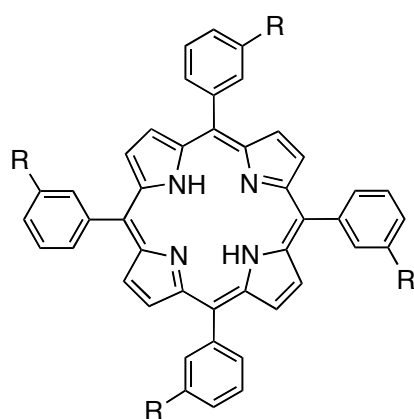

**5b**: R = O(CH<sub>2</sub>)<sub>8</sub>Br

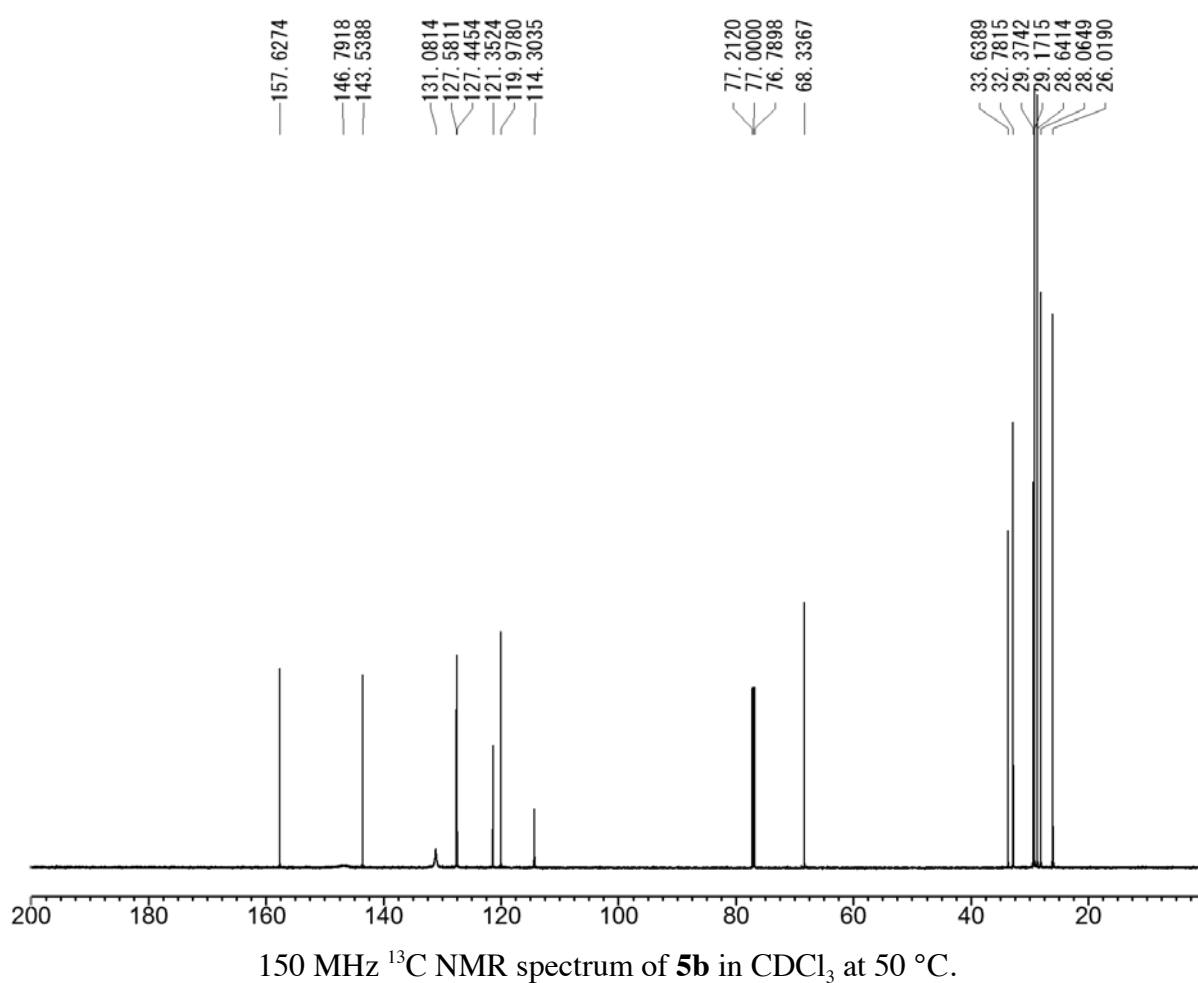

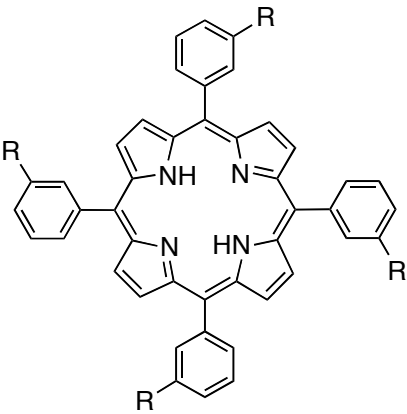

**5c:** R = O(CH<sub>2</sub>)<sub>4</sub>Br

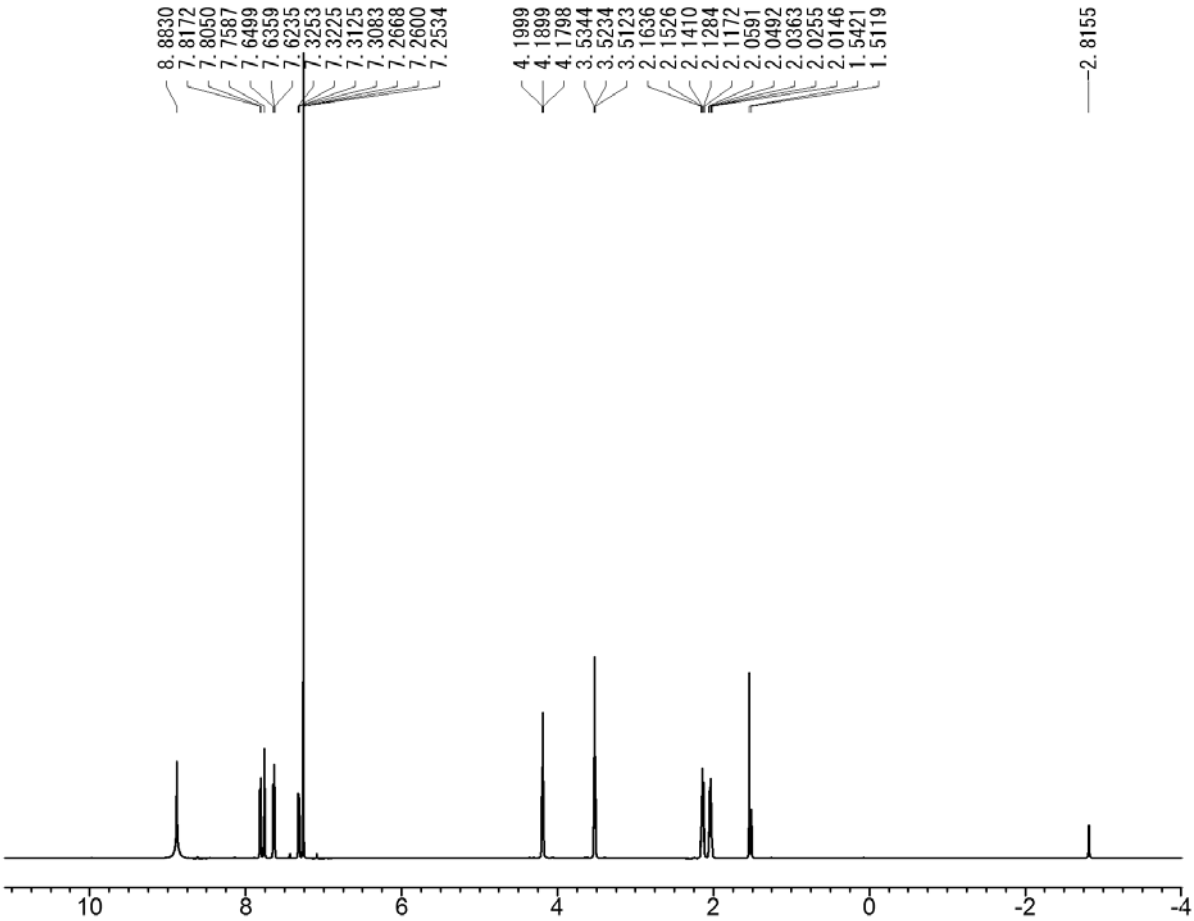

600 MHz <sup>1</sup>H NMR spectrum of **5c** in CDCl<sub>3</sub>.

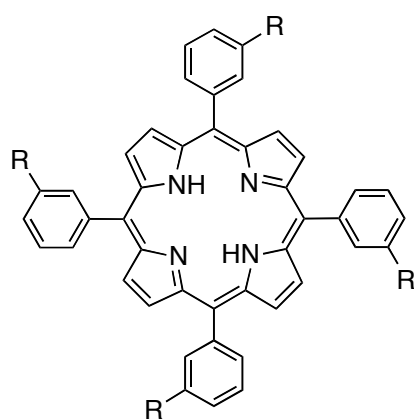

**5c:** R = O(CH<sub>2</sub>)<sub>4</sub>Br

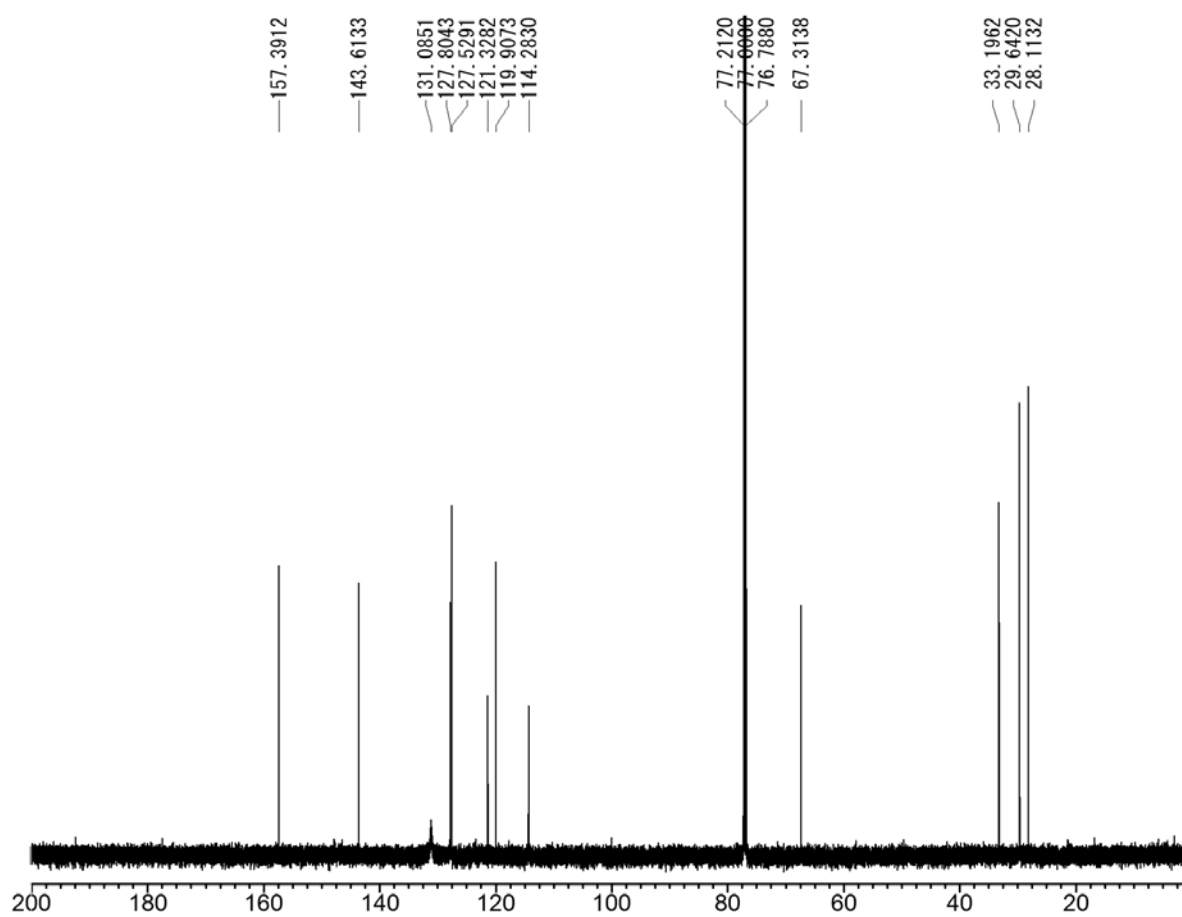

150 MHz <sup>13</sup>C NMR spectrum of **5c** in CDCl<sub>3</sub> at 50 °C.



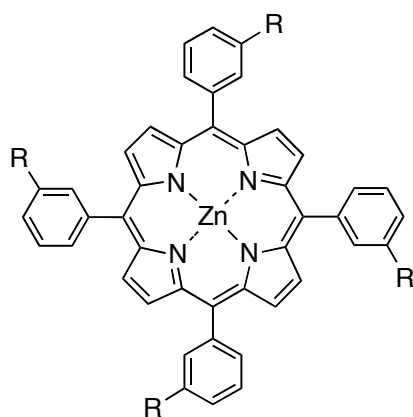

**6a:** R = O(CH<sub>2</sub>)<sub>6</sub>Br

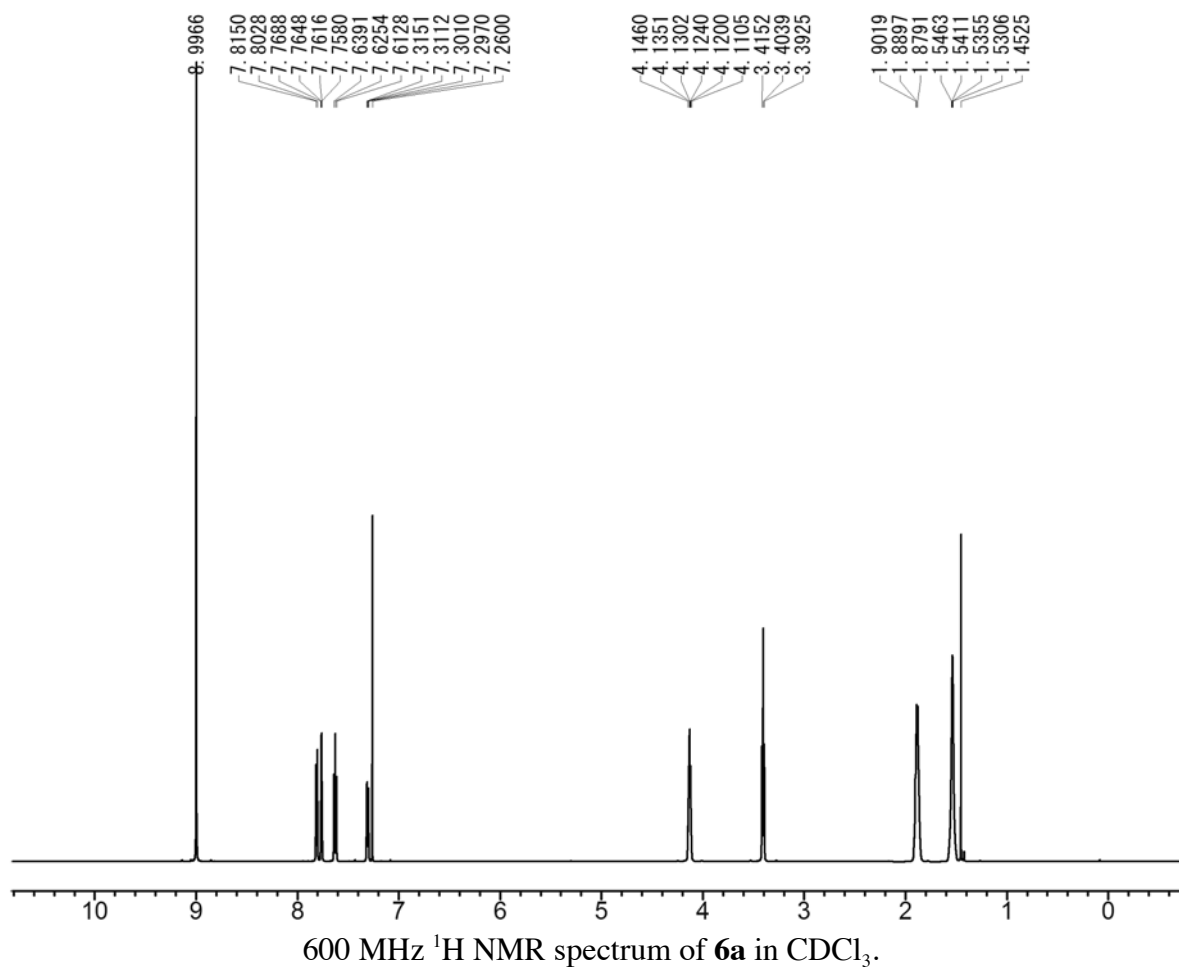



**6a:** R = O(CH<sub>2</sub>)<sub>6</sub>Br

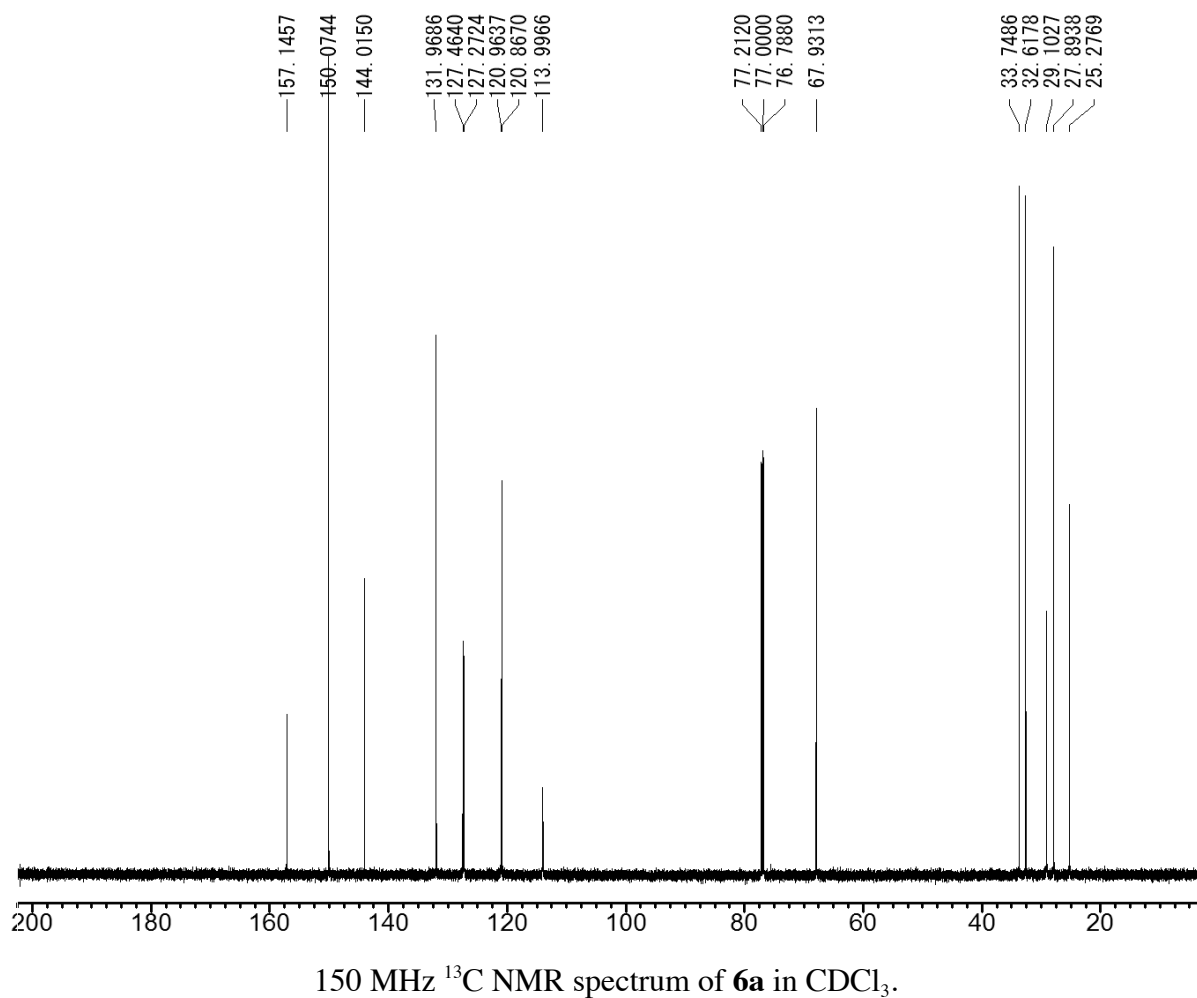

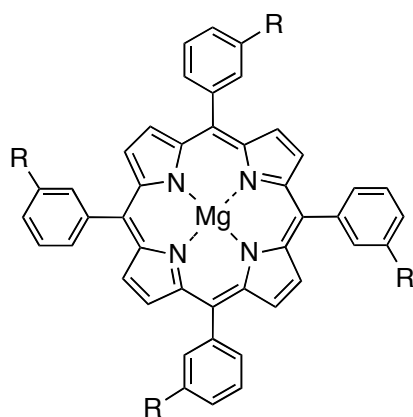

**6b:** R = O(CH<sub>2</sub>)<sub>6</sub>Br

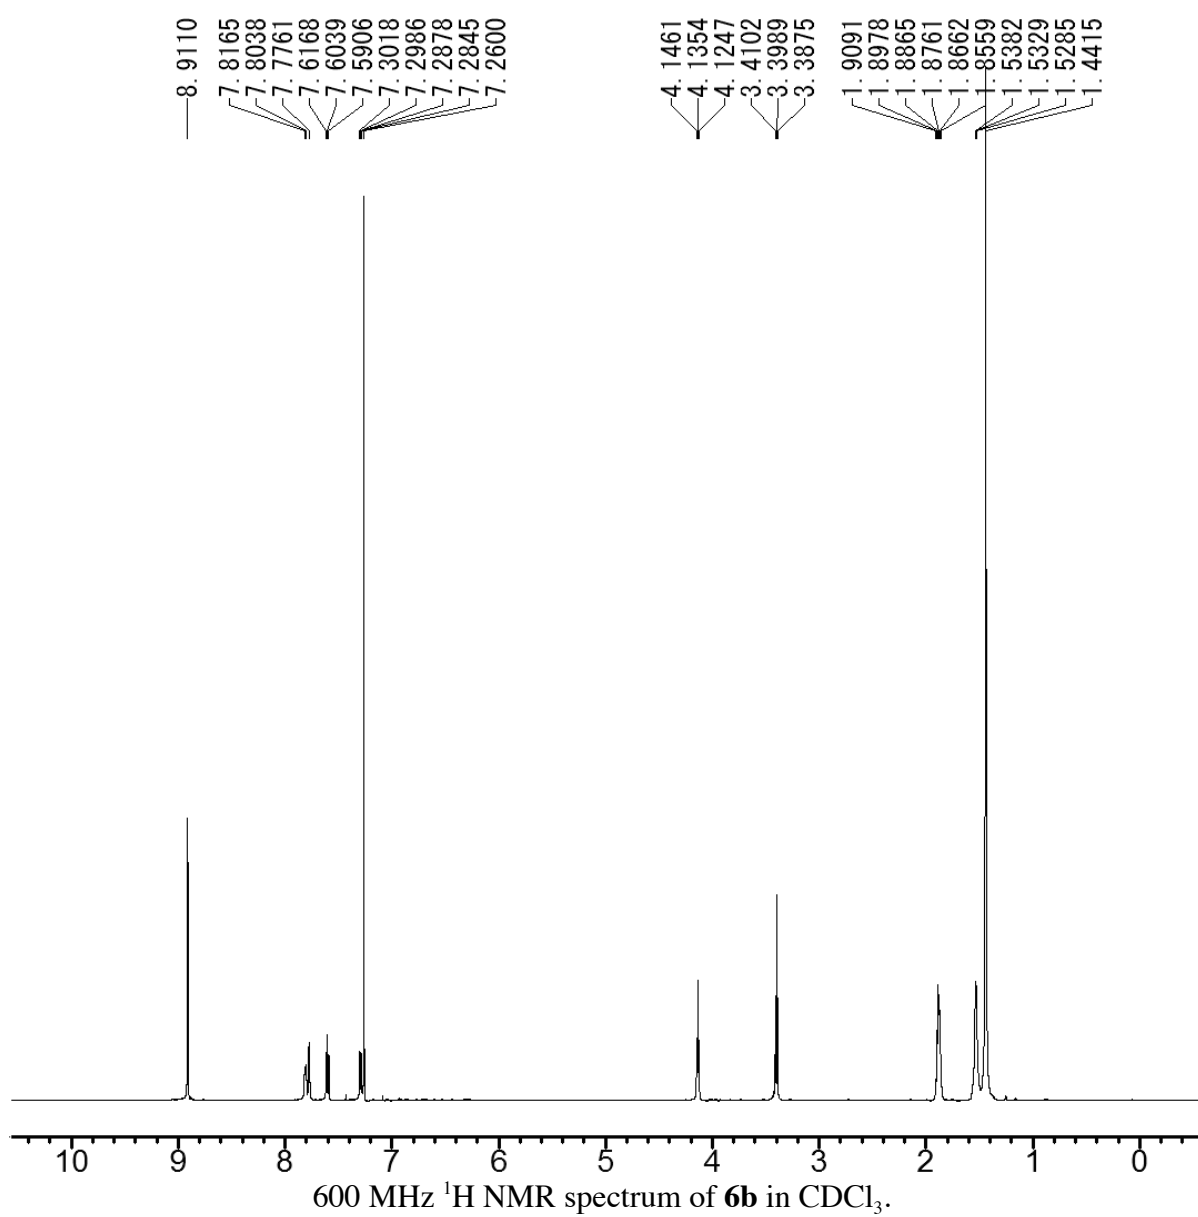



**6b**: R = O(CH<sub>2</sub>)<sub>6</sub>Br

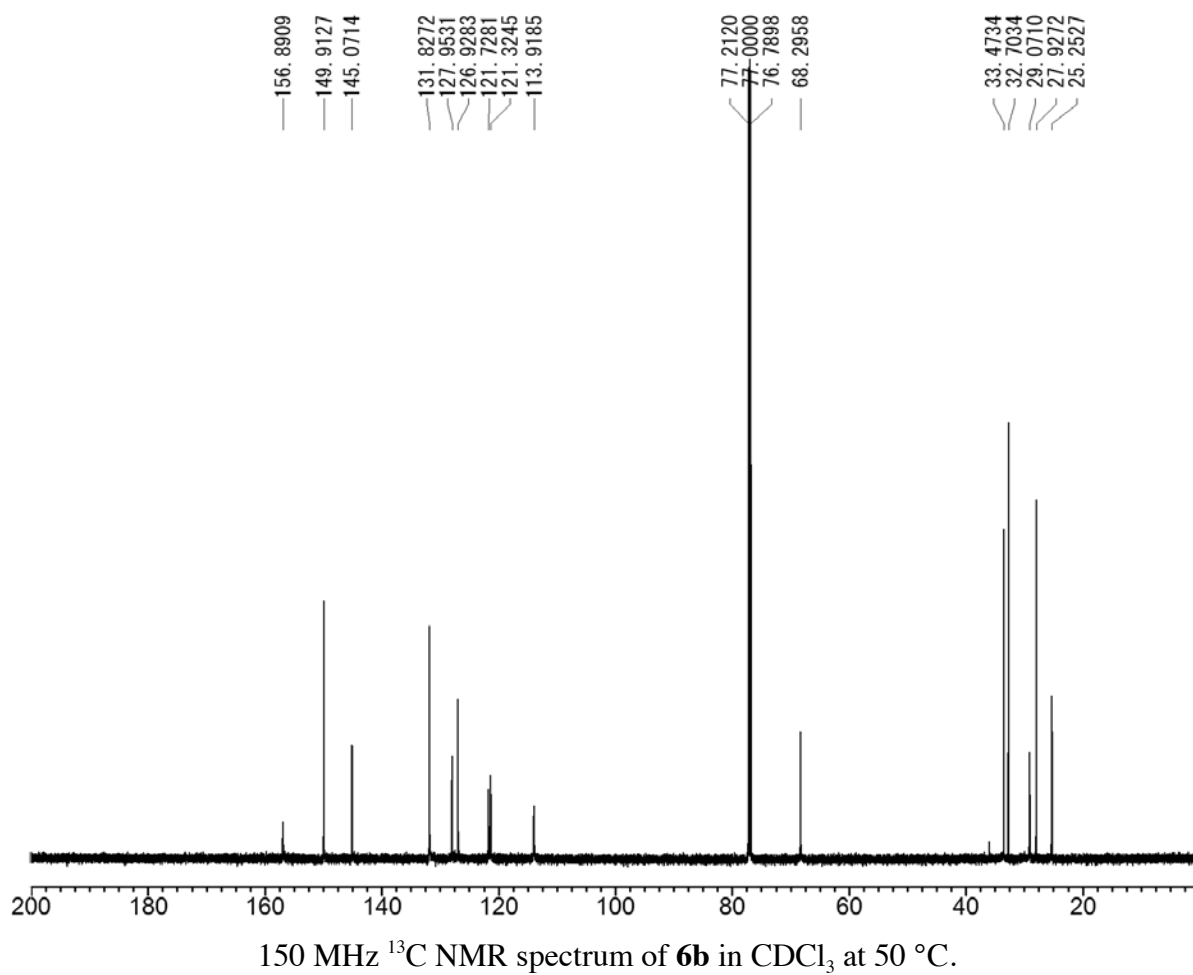

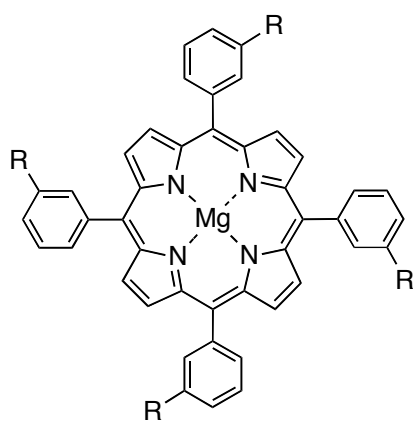

**6c:** R = O(CH<sub>2</sub>)<sub>8</sub>Br

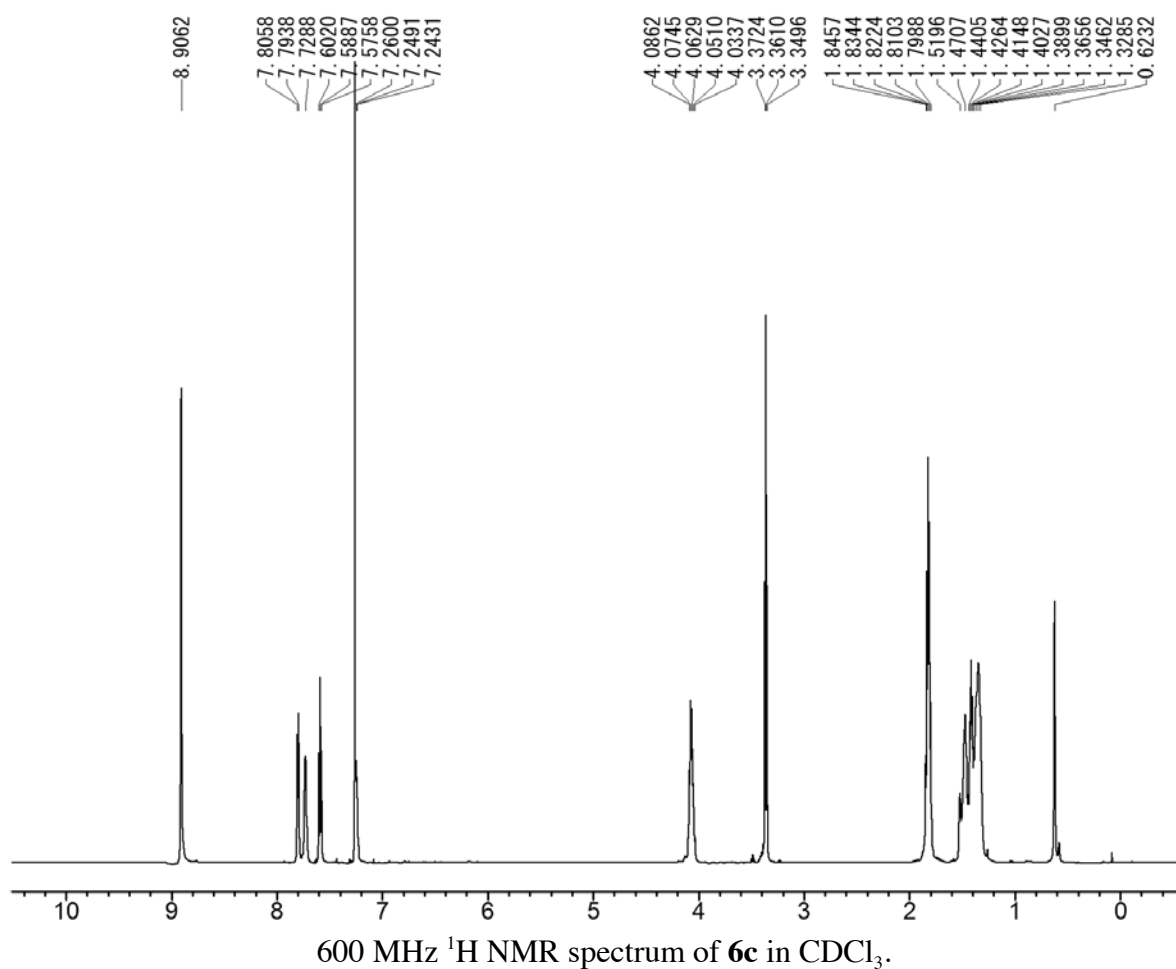

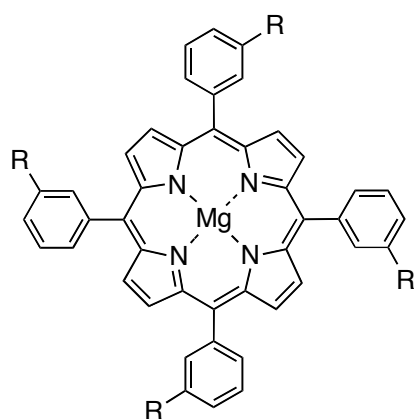

**6c:** R = O(CH<sub>2</sub>)<sub>8</sub>Br

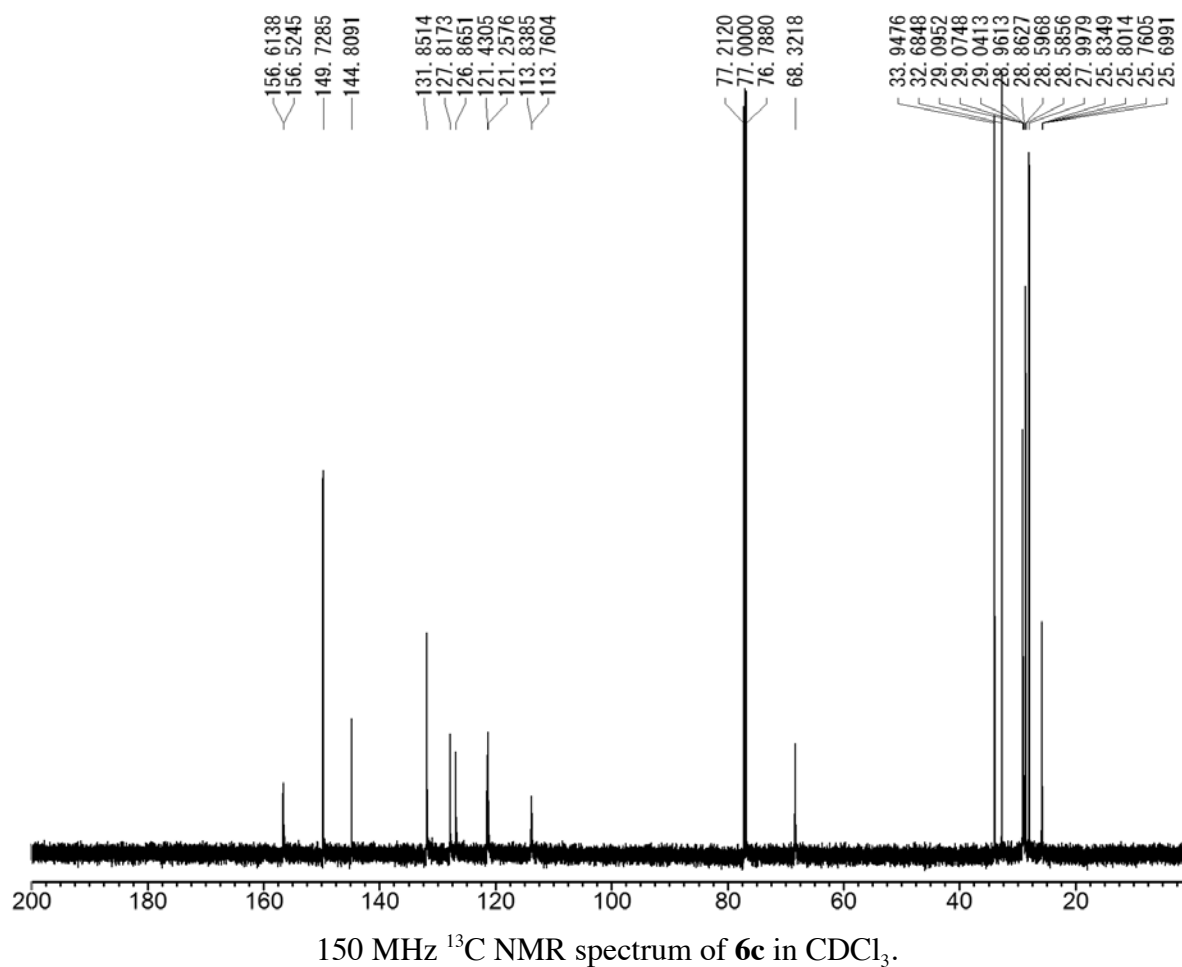

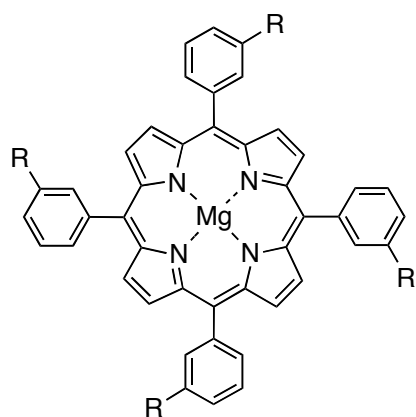

**6d**: R = O(CH<sub>2</sub>)<sub>4</sub>Br

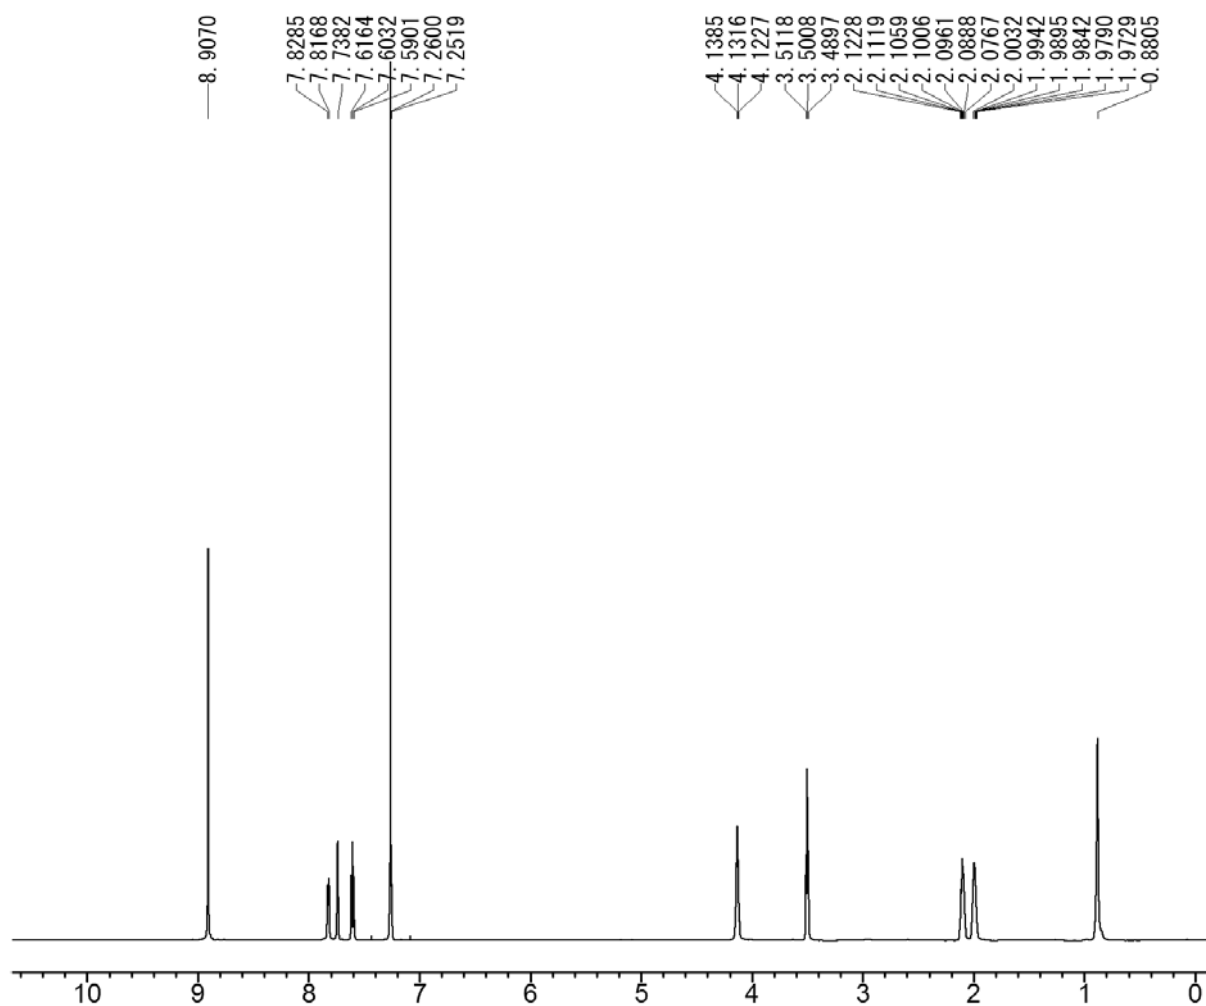

600 MHz <sup>1</sup>H NMR spectrum of **6d** in CDCl<sub>3</sub>.

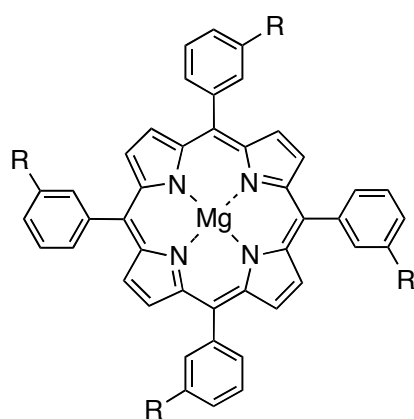

**6d:** R = O(CH<sub>2</sub>)<sub>4</sub>Br

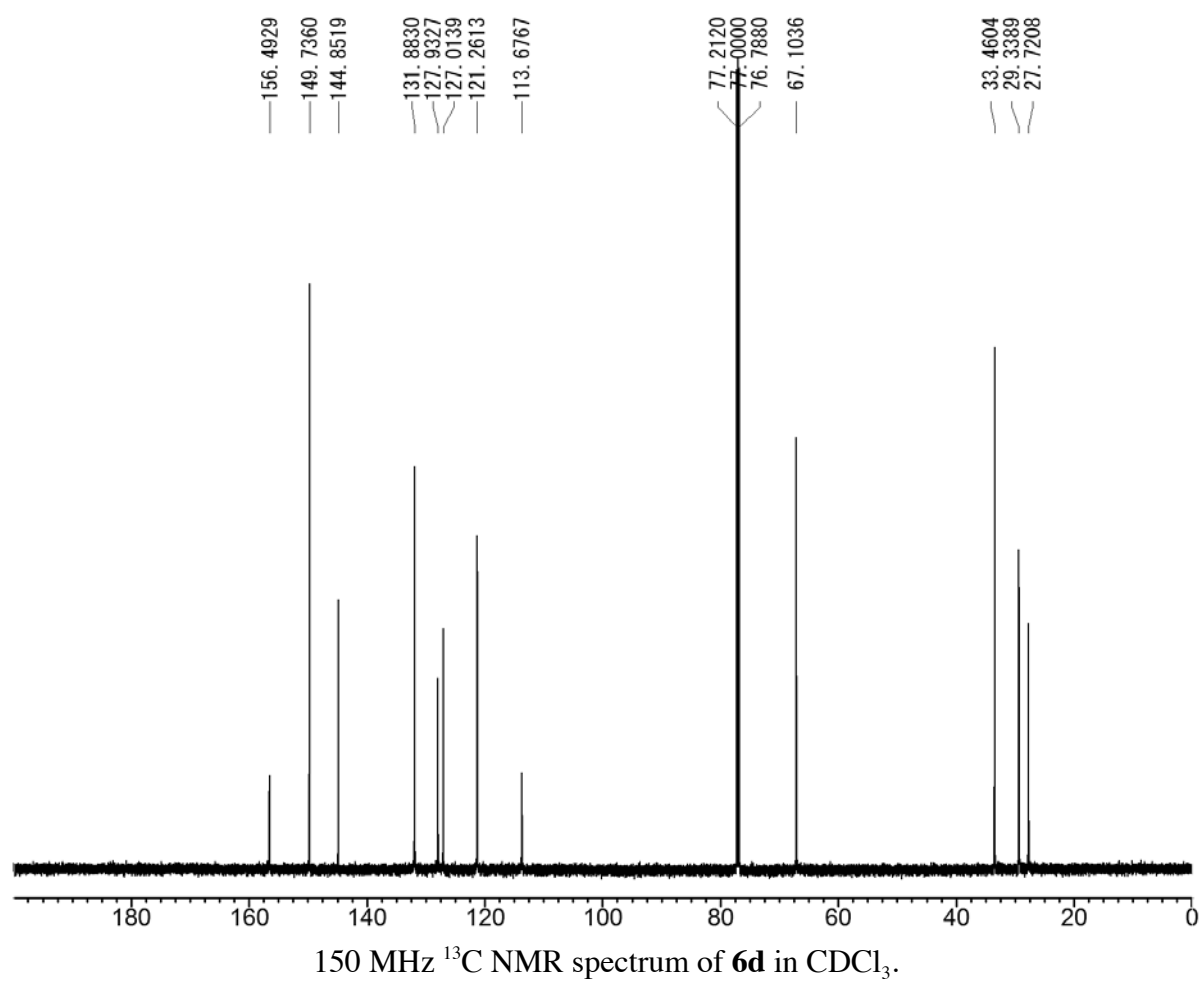

Supplement: c2cc30591g.pdf [file c2cc30591g.pdf]
